# Supplementary material for: “On water” reaction of deactivated anilines with 4-methoxy-3-buten-2-one, an effective butynone surrogate
Source: Royal Society of Chemistry journal article supplement (doi:10.1039/c6ob02402e), 2016-01-01

## Supplementary Information

### “On water” reaction of deactivated anilines with 4-methoxy-3-buten-2-one, an effective butynone surrogate

Meriam Jebari,<sup>a,b</sup> Karine Pasturaud,<sup>a</sup> Baptiste Picard,<sup>a</sup> Jacques Maddaluno,<sup>a</sup> Farhat Rezgui,<sup>b</sup>  
Isabelle Chataigner<sup>a</sup> and Julien Legros\*<sup>a</sup>

<sup>a</sup> Normandie Univ, INSA Rouen, UNIROUEN, CNRS, COBRA, 76000 Rouen, France.

<sup>b</sup> Université de Tunis El Manar, Faculté des Sciences de Tunis, Laboratoire de Chimie Organique Structurale LR99ES14, Campus Universitaire, 2092 Tunis, Tunisia.

#### Table of contents

|                                                                                          |    |
|------------------------------------------------------------------------------------------|----|
| Kinetics measurements of the reaction between <b>1</b> and <b>2a</b> in various solvents | S2 |
| Experimental section                                                                     | S4 |
| Copies of NMR spectra                                                                    | S7 |

## Kinetics measurements of the reaction between 1 and 2a in various solvents

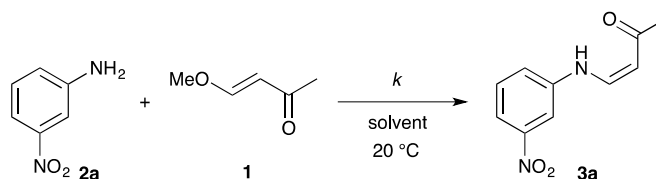

Reactions were performed at 20 °C with butenone **1** (0.5 mmol), aniline **2a** (0.6 mmol) and solvent (0.5 mL) under vigorous stirring (1400 rpm).

|                     |  | DCM Time (h)  |            |            |            | k (L/mol/h) |            |
|---------------------|--|---------------|------------|------------|------------|-------------|------------|
| [methoxybutenone]   |  | 0             | 2          | 8          | 24         |             |            |
|                     |  | 1             | 0,81       | 0,63       | 0,24       |             |            |
| 1/[methoxybutenone] |  | 1             | 1,2345679  | 1,58730159 | 4,16666667 | 0,13        |            |
|                     |  | EtOH Time (h) |            |            |            | k (L/mol/h) |            |
| [methoxybutenone]   |  | 0             | 0,5        | 1          | 2          | 19,5        | 24         |
|                     |  | 1             | 0,92       | 0,9        | 0,83       | 0,49        | 0,45       |
| 1/[methoxybutenone] |  | 1             | 1,08695652 | 1,11111111 | 1,20481928 | 2,04081633  | 2,22222222 |
|                     |  | TFE Time (h)  |            |            |            | k (L/mol/h) |            |
| [methoxybutenone]   |  | 0             | 2          | 8          | 24         |             |            |
|                     |  | 1             | 0,81       | 0,51       | 0,17       |             |            |
| 1/[methoxybutenone] |  | 1             | 1,2345679  | 1,96078431 | 5,88235294 | 0,21        |            |
|                     |  | HFIP Time (h) |            |            |            | k (L/mol/h) |            |
| [methoxybutenone]   |  | 0             | 2          | 8          | 24         |             |            |
|                     |  | 1             | 0,69       | 0,37       | 0,14       |             |            |
| 1/[methoxybutenone] |  | 1             | 1,44927536 | 2,7027027  | 7,14285714 | 0,26        |            |
|                     |  | H2O Time (h)  |            |            |            | k (L/mol/h) |            |
| [methoxybutenone]   |  | 0             | 0,083      | 0,166      | 0,5        | 1           | 2          |
|                     |  | 1             | 0,7        | 0,52       | 0,25       | 0,08        | 0,04       |
| 1/[methoxybutenone] |  | 1             | 1,42857143 | 1,92307692 | 4          | 12,5        | 25         |
|                     |  | neat Time (h) |            |            |            | k (L/mol/h) |            |
| [methoxybutenone]   |  | 0             | 1          | 2          | 24         |             |            |
|                     |  | 10            | 10         | 6,5        | 0,2        |             |            |
| 1/[methoxybutenone] |  | 0,1           | 0,1        | 0,15384615 | 5          | 0,21        |            |

Solvent effect on the reaction between methoxybutenone (1) and 3-nitroaniline (2a)

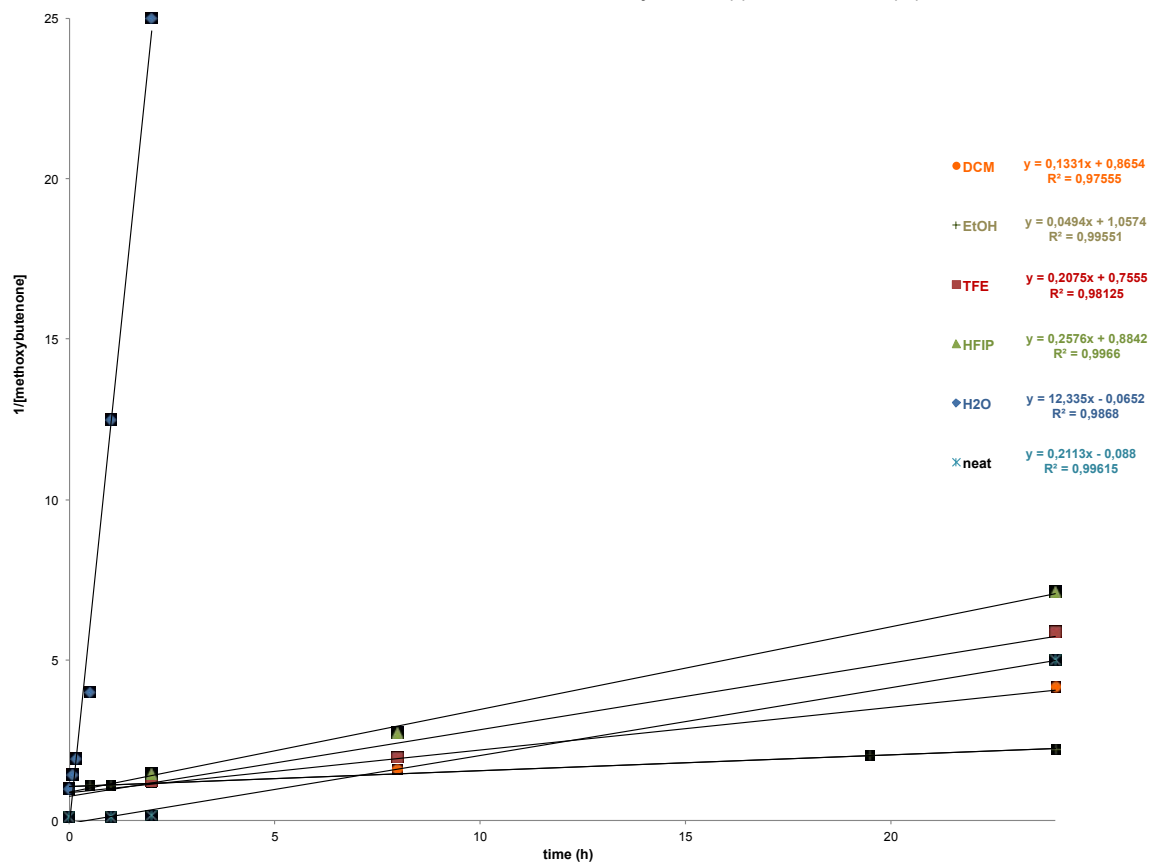

## Experimental Section

Silica gel used for chromatography was 40  $\mu\text{m}$  diameter.  $^1\text{H}$  and  $^{13}\text{C}$  spectra were recorded at 300 and 75 MHz, respectively, for solution in  $\text{CDCl}_3$ . Chemical shift ( $\delta$ ) in ppm are reported using residual chloroform (7.26 for  $^1\text{H}$  and 77.16 for  $^{13}\text{C}$ ) as internal reference. Micromass Q-TQF (Quadrupole time-of-flight) instrument with an electrospray source in the EI or ESI mode.

### General Procedure for the “on water” reaction between *trans*-4-methoxy-3-buten-2-one **1** and anilines

In a capped vial, water (0.5 mL) was added to *trans*-4-methoxy-3-buten-2-one **1** (0.5 mmol) under vigorous stirring (1400 rpm) followed by aromatic amine **2a-p** (0.6 mmol). The mixture was kept at room temperature or warmed to 60  $^\circ\text{C}$  according to Table 2. After completion of the reaction ( $^1\text{H}$  NMR monitoring), the aqueous phase was extracted with dichloromethane (2x1.5 mL). The combined organic layers were dried over anhydrous  $\text{MgSO}_4$ , filtered, and the solvent was evaporated under vacuum. The product was isolated in pure form by column chromatography (cyclohexane/AcOEt, 95:05 to 70:30).

**(Z)-4-((3-Nitrophenyl)amino)-but-3-en-2-one (3a)**: yellow crystals, 89 mg, (86%), mp ( $^\circ\text{C}$ ): 113;  $^1\text{H}$  NMR ( $\text{CDCl}_3$ , 300 MHz):  $\delta$  = 2.18 (s, 3 H), 5.41 (d,  $J$  = 8.03 Hz, 1 H), 7.19-7.29 (m, 2H), 7.45 (t,  $J$  = 8.0 Hz, 1 H), 7.88-7.81 (m, 2H), 11.68 (d,  $J$  = 10.5, 1 H) ppm.  $^{13}\text{C}$  NMR ( $\text{CDCl}_3$ , 75 MHz)  $\delta$  = 29.9, 99.5, 109.8, 117.6, 122.1, 130.6, 141.5, 141.8, 149.4, 200.0 ppm; IR (neat)  $\nu$  ( $\text{cm}^{-1}$ ) 1350, 1621; HRMS (ES+)  $m/z$  [ $\text{M} + \text{H}$ ] $^+$  calcd for  $\text{C}_{10}\text{H}_{11}\text{N}_2\text{O}_3$  207.0770; found 207.0771.

**(Z)-4-((4-Nitrophenyl)amino)-but-3-en-2-one (3b)**:<sup>1</sup> yellow crystals, 79 mg, (77%), mp ( $^\circ\text{C}$ ): 174;  $^1\text{H}$  NMR (300 MHz,  $\text{CDCl}_3$ ):  $\delta$  = 2.21 (s, 3 H), 5.47 (d,  $J$  = 8.0 Hz, 1 H), 7.07 (d,  $J$  = 9 Hz, 2 H), 7.22 (dd,  $J$  = 11.9, 8.0 Hz, 1 H), 8.20 (d,  $J$  = 9 Hz, 2 H), 11.72 (d,  $J$  = 10.8 Hz, 1 H) ppm.  $^{13}\text{C}$  NMR ( $\text{CDCl}_3$ , 75 MHz)  $\delta$  = 30.2, 100.9, 115.1, 126.2, 140.5, 142.8, 146.1, 200.4 ppm; IR (neat)  $\nu$  ( $\text{cm}^{-1}$ ) 1324.97, 1648.2; HRMS (ES+)  $m/z$  [ $\text{M} + \text{H}$ ] $^+$  calcd for  $\text{C}_{10}\text{H}_{11}\text{N}_2\text{O}_3$  207.0770; found 207.0773.

**(Z)-4-((4-(Trifluoromethyl)phenyl)amino)-but-3-en-2-one (3c)**: white crystals, 113 mg, (98%), mp ( $^\circ\text{C}$ ): 127;  $^1\text{H}$  NMR ( $\text{CDCl}_3$ , 300 MHz):  $\delta$  = 2.16 (s, 3 H), 5.36 (dd,  $J$  = 7.5, 1.4 Hz, 1 H), 7.05 (d,  $J$  = 7.5 Hz, 2 H), 7.14-7.25 (m, 1 H), 7.53 (d,  $J$  = 7.5, 2 H), 11.60 (d,  $J$  = 9.7 Hz, 1 H) ppm.  $^{13}\text{C}$  NMR ( $\text{CDCl}_3$ , 75 MHz)  $\delta$  = 29.8, 99.2, 115.6, 124.2 (q,  $^1J_{\text{C-F}}$  = 270 Hz), 124.9 (q,  $^2J_{\text{C-F}}$  = 32 Hz), 127.09 (q,  $^3J_{\text{C-F}}$  = 3.8 Hz), 141.7, 143.4, 199.8 ppm; IR (neat)  $\nu$  ( $\text{cm}^{-1}$ ) 1648; HRMS (ES+)  $m/z$  [ $\text{M} + \text{H}$ ] $^+$  calcd for  $\text{C}_{11}\text{H}_{11}\text{F}_3\text{NO}$  230.0793; found 230.0792.

**(Z)-4-((3-(Trifluoromethyl)phenyl)amino)-but-3-en-2-one (3d)**: white crystals, 108 mg, (94%), mp ( $^\circ\text{C}$ ): 73;  $^1\text{H}$  NMR ( $\text{CDCl}_3$ , 300 MHz):  $\delta$  = 2.18 (s, 3 H), 5.32-5.44 (m, 1 H), 7.11-7.32 (m, 4 H), 7.35-7.49 (m, 1 H), 11.67 (d,  $J$  = 9.3 Hz, 1 H) ppm.  $^{13}\text{C}$  NMR ( $\text{CDCl}_3$ , 75 MHz)  $\delta$  = 29.6, 98.6, 112.3 (q,  $^3J_{\text{C-F}}$  = 3.8 Hz), 119.1, 119.6, 123.8 (q,  $^1J_{\text{C-F}}$  = 271 Hz), 130.2, 132.1 (q,  $^2J_{\text{C-F}}$  = 32 Hz), 141.0, 142.0, 199.5 ppm; IR (neat)  $\nu$  ( $\text{cm}^{-1}$ ) 1665.52 (C=C) *cis*, 3047 (CH<sub>3</sub>); HRMS (ES+)  $m/z$  [ $\text{M} + \text{H}$ ] $^+$  calcd for  $\text{C}_{11}\text{H}_{11}\text{F}_3\text{NO}$  230.0793; found 230.0801.

**(Z)-4-((2-(Trifluoromethyl)phenyl)amino)-but-3-en-2-one (3e)**: white crystals, 96 mg, (83%), mp ( $^\circ\text{C}$ ): 40;  $^1\text{H}$  NMR ( $\text{CDCl}_3$ , 300 MHz):  $\delta$  = 2.16 (s, 3 H), 5.39 (d,  $J$  = 7.8 Hz, 1 H), 7.04-7.26 (m, 3 H), 7.48 (t,  $J$  = 7.8 Hz, 1 H), 7.57 (d,  $J$  = 7.8 Hz), 12.07 (d,  $J$  = 9 Hz, 1 H) ppm.  $^{13}\text{C}$  NMR ( $\text{CDCl}_3$ , 75 MHz)  $\delta$  = 29.6, 99.7, 116.3, 118.6 (q,  $^2J_{\text{C-F}}$  = 31 Hz), 122.7, 124.0 (q,  $^1J_{\text{C-F}}$  = 273 Hz), 127.0 (q,  $^3J_{\text{C-F}}$  = 5.5 Hz), 133.3, 138.9, 142.4, 199.5 ppm; IR (neat)  $\nu$  ( $\text{cm}^{-1}$ ) (C-F), 1646.61; HRMS (ES+)  $m/z$  [ $\text{M} + \text{H}$ ] $^+$  calcd for  $\text{C}_{11}\text{H}_{11}\text{F}_3\text{NO}$  230.0793; found 230.0788.

**(Z)-4-((4-Chlorophenyl)amino)-but-3-en-2-one (3f):**<sup>1</sup> white crystals, 96 mg, (98%), mp (°C): 113; <sup>1</sup>H NMR (CDCl<sub>3</sub>, 300 MHz): δ= 2.17 (s, 3 H), 5.33 (d, *J* = 7.8 Hz, 1 H), 6.95 (d, *J* = 8.4 Hz, 2H), 7.15 (dd, *J* = 12.3, 7.8 Hz, 1H), 7.28 (d, *J* = 8.4 Hz, 2H), 11.59 (d, *J* = 10 Hz, 1H) ppm. <sup>13</sup>C NMR (CDCl<sub>3</sub>, 75 MHz) δ= 29.6, 98.0, 117.2, 128.3, 129.7, 139.0, 142.6, 199.2 ppm; IR (neat) ν (cm<sup>-1</sup>) 1643; HRMS (ES+) *m/z* [M + H]<sup>+</sup> calcd for C<sub>10</sub>H<sub>11</sub>ClNO 196.0529; found 196.0528.

**(Z)-4-((3-Chlorophenyl)amino)-but-3-en-2-one (3g):** white crystals, 90 mg, (92%), mp (°C): 85; <sup>1</sup>H NMR (CDCl<sub>3</sub>, 300 MHz): δ= 2.21 (s, 3 H), 5.38 (d, *J* = 8 Hz), 6.92 (d, *J* = 8 Hz, 1 H), 7.02-7.08 (m, 2 H), 7.16-7.31 (m, 2H), 11.58 (d, *J* = 12 Hz, 1 H) ppm. <sup>13</sup>C NMR (CDCl<sub>3</sub>, 75 MHz) δ= 29.8, 98.5, 114.5, 116.0, 123.3, 130.8, 135.6, 141.8, 142.3, 199.4 ppm; IR (neat) ν (cm<sup>-1</sup>) 1648; HRMS (ES+) *m/z* [M + H]<sup>+</sup> calcd for C<sub>10</sub>H<sub>11</sub>ClNO 196.0529; found 196.0529.

**(Z)-4-((2-Chlorophenyl)amino)-but-3-en-2-one (3h):** white crystals, 92 mg, (94%), mp (°C): 70; <sup>1</sup>H NMR (CDCl<sub>3</sub>, 300 MHz): δ= 2.22 (s, 3 H), 5.44 (d, *J* = 7.8 Hz, 1 H), 6.98 (t, *J* = 7.8 Hz, 1 H), 7.11-7.33 (m, 3H), 7.40 (d, *J* = 7.8 Hz, 1H), 11.99 (br s, 1 H) ppm. <sup>13</sup>C NMR (CDCl<sub>3</sub>, 75 MHz) δ= 29.6, 99.1, 114.0, 122.4, 123.3, 127.9, 130.1, 137.4, 141.3, 199.2 ppm; IR (neat) ν (cm<sup>-1</sup>) 1644.03; HRMS (ES+) *m/z* [M + H]<sup>+</sup> calcd for C<sub>10</sub>H<sub>11</sub>ClNO 196.0529; found 196.0527.

**(Z)-4-((4-Chloro-2-fluorophenyl)amino)-but-3-en-2-one (3i):** white crystals, 99 mg, (93%), mp (°C): 102; <sup>1</sup>H NMR (300 MHz, CDCl<sub>3</sub>): δ= 2.11 (s, 3 H), 5.34 (d, *J* = 7.84 Hz, 1 H), 6.95-7.15 (m, 4H), 11.56 (d, *J* = 11.7, 1H) ppm. <sup>13</sup>C NMR (CDCl<sub>3</sub>, 75 MHz) δ= 29.7, 99.2, 115.7, 116.8 (d, <sup>2</sup>*J*<sub>C-F</sub> = 22 Hz), 125.0 (d, <sup>3</sup>*J*<sub>C-F</sub> = 3.8 Hz), 127.5 (d, <sup>3</sup>*J*<sub>C-F</sub> = 9.3 Hz), 128.0 (d, <sup>2</sup>*J*<sub>C-F</sub> = 11 Hz), 141.5, 151.7 (d, <sup>1</sup>*J*<sub>C-F</sub> = 252 Hz), 199.4 ppm; IR (neat) ν (cm<sup>-1</sup>) 1643; HRMS (ES+) *m/z* [M + H]<sup>+</sup> calcd for C<sub>10</sub>H<sub>10</sub>ClFNO 214.0435; found 214.0432.

**(Z)-4-((3-Chloro-4-fluorophenyl)amino)-but-3-en-2-one (3j):** brown crystals, 92 mg, (86%), mp (°C): 85; <sup>1</sup>H NMR (CDCl<sub>3</sub>, 300 MHz): δ= 2.15 (s, 3 H), 5.31 (d, *J* = 7.8 Hz, 1 H), 6.81-6.88 (m, 1 H), 7.01-7.11 (m, 3 H), 11.53 (d, *J* = 11 Hz, 1 H) ppm. <sup>13</sup>C NMR (CDCl<sub>3</sub>, 75 MHz) δ= 29.7, 98.4, 115.8 (d, <sup>3</sup>*J*<sub>C-F</sub> = 7 Hz), 117.5 (d, <sup>2</sup>*J*<sub>C-F</sub> = 23 Hz), 117.9, 122.1 (d, <sup>2</sup>*J*<sub>C-F</sub> = 20 Hz), 137.5 (d, *J*<sub>C-F</sub> = 2 Hz), 142.8, 154.4 (d, <sup>1</sup>*J*<sub>C-F</sub> = 245 Hz), 199.4 ppm; IR (neat) ν (cm<sup>-1</sup>); HRMS (ES+) *m/z* [M + H]<sup>+</sup> calcd for C<sub>10</sub>H<sub>10</sub>ClN<sub>2</sub>FNO 214.0435; found 214.0436.

**(Z)-4-((2,4-Difluorophenyl)amino)-but-3-en-2-one (3k):** white crystals, 82 mg (83%), mp (°C): 95; <sup>1</sup>H NMR (CDCl<sub>3</sub>, 300 MHz): δ= 2.14 (s, 3 H), 5.35 (d, *J* = 7.6 Hz, 1 H), 6.77-6.92 (m, 2H), 7.00-7.18 (m, 2H), 11.58 (d, *J* = 10.7 Hz, 1 H) ppm. <sup>13</sup>C NMR (CDCl<sub>3</sub>, 75 MHz) δ= 29.6, 98.7, 104.8 (dd, *J*<sub>C-F</sub> = 27, 22 Hz), 111.6 (dd, *J*<sub>C-F</sub> = 23, 3.2 Hz), 116.2 (dd, *J*<sub>C-F</sub> = 9.4, 2.9 Hz), 125.8 (dd, *J*<sub>C-F</sub> = 11, 3.4 Hz), 142.6, 152.1 (dd, *J*<sub>C-F</sub> = 246, 11 Hz), 158.1 (dd, *J*<sub>C-F</sub> = 246, 11 Hz), 199.3 ppm; IR (neat) ν 1635 1733; HRMS (ES+) *m/z* [M + H]<sup>+</sup> calcd for C<sub>10</sub>H<sub>10</sub>F<sub>2</sub>NO 198.0730; found 198.0736.

**(Z)-4-((3-Fluorophenyl)amino)-but-3-en-2-one (3l):** white crystals, 78 mg (87%), mp (°C): 58; <sup>1</sup>H NMR (CDCl<sub>3</sub>, 300 MHz): δ= 2.14 (s, 3 H), 5.31 (d, *J* = 7.8 Hz, 1 H), 6.63-6.84 (m, 3 H), 7.07-7.29 (m, 2 H), 11.52 (d, *J* = 10 Hz, 1 H) ppm. <sup>13</sup>C NMR (CDCl<sub>3</sub>, 75 MHz) δ= 29.7, 98.3, 103.0 (d, <sup>2</sup>*J*<sub>C-F</sub> = 25Hz), 109.9 (d, <sup>2</sup>*J*<sub>C-F</sub> = 20 Hz), 111.8 (d, <sup>4</sup>*J*<sub>C-F</sub> = 2.8 Hz), 131.0 (d, <sup>3</sup>*J*<sub>C-F</sub> = 10 Hz), 142.2 (d, <sup>3</sup>*J*<sub>C-F</sub> = 10 Hz), 142.3, 163.7 (d, <sup>1</sup>*J*<sub>C-F</sub> = 247 Hz), 199.3 ppm; IR (neat) ν (cm<sup>-1</sup>) 1641.6; HRMS (ES+) *m/z* [M + H]<sup>+</sup> calcd for C<sub>10</sub>H<sub>11</sub>FNO 180.0825; found 183.0577.

**(Z)-4-((Phenylamino)-but-3-en-2-one (3m):**<sup>1</sup> white crystals, 71 mg, (89%), mp (°C): 85; <sup>1</sup>H NMR (CDCl<sub>3</sub>, 300 MHz): δ = 2.16 (s, 3 H), 5.30 (d, *J* = 7.8 Hz, 1H), 7.00-7.04 (m, 3H), 7.23 (dd, *J* = 12.5,

7.9 Hz, 1H), 7.32 (t,  $J = 7.9$  Hz, 2H), 11.62 (d,  $J = 12.5$ , 1H) ppm.  $^{13}\text{C}$  NMR ( $\text{CDCl}_3$ , 75 MHz)  $\delta = 29.6, 97.5, 116.1, 123.4, 129.7, 140.4, 143.0, 199.0$  ppm; IR (neat)  $\nu$  ( $\text{cm}^{-1}$ ) 1666, 3231; HRMS (ES+)  $m/z$   $[\text{M} + \text{H}]^+$  calcd for  $\text{C}_{10}\text{H}_{12}\text{NO}$  162.0919; found 162.0916.

**(Z)-4-((4-Methoxyphenyl)amino)-but-3-en-2-one (3n):**<sup>1</sup> Brown crystals, 93 mg, (97%), mp ( $^{\circ}\text{C}$ ): 65;  $^1\text{H}$  NMR ( $\text{CDCl}_3$ , 300 MHz):  $\delta = 2.14$  (s, 3 H), 3.78 (s, 3 H), 5.24 (d,  $J = 7.4$  Hz, 1 H), 6.85 (d,  $J = 9.03$  Hz, 2H), 6.97 (dd,  $J = 9.03$  Hz, 2H), 7.13 (dd,  $J = 11.4, 7.6$  Hz, 1 H), 11.61 (d,  $J = 11.5$  Hz, 1 H) ppm.  $^{13}\text{C}$  NMR ( $\text{CDCl}_3$ , 75 MHz)  $\delta = 29.5, 55.7, 96.7, 115.0, 117.8, 134.2, 144.1, 156.8, 198.5$  ppm; IR (neat)  $\nu$  ( $\text{cm}^{-1}$ ) 1635; HRMS (ES+)  $m/z$   $[\text{M} + \text{H}]^+$  calcd for  $\text{C}_{11}\text{H}_{14}\text{NO}_2$  192.1025; found 192.1024.

**(E)-4-(Methyl(phenyl)amino)but-3-en-2-one (3o):**<sup>1</sup> pink oil, 85 mg, (98%),  $^1\text{H}$  NMR ( $\text{CDCl}_3$ , 300 MHz):  $\delta = 2.17$  (s, 3 H), 3.26 (s, 3 H), 5.40 (d,  $J = 12.9$  Hz, 1 H), 7.10-7.17 (m, 3 H), 7.30-7.39 (m, 2 H), 7.88 (d,  $J = 12.9$  Hz, 1 H) ppm.  $^{13}\text{C}$  NMR ( $\text{CDCl}_3$ , 75 MHz)  $\delta = 28.3, 37.0, 101.9, 120.4, 124.8, 129.6, 146.6, 148.5, 196.4$  ppm; IR (neat)  $\nu$  ( $\text{cm}^{-1}$ ) 1611.68; HRMS (ES+)  $m/z$   $[\text{M} + \text{H}]^+$  calcd for  $\text{C}_{11}\text{H}_{14}\text{NO}$  176.1075; found 176.1071.

**(E)-4-((4-Chlorophenyl)(methyl)amino)but-3-en-2-one (3p):** brown oil, 87 mg (83%)  $^1\text{H}$  NMR (300 MHz,  $\text{CDCl}_3$ ):  $\delta = 2.10$  (s, 3 H), 3.16 (s, 3 H), 5.35 (d,  $J = 13$  Hz, 1 H), 6.99 (d,  $J = 8.5$  Hz, 2 H), 7.23 (d,  $J = 8.5$  Hz, 2 H), 7.74 (d,  $J = 13$  Hz, 1 H) ppm.  $^{13}\text{C}$  NMR ( $\text{CDCl}_3$ , 75 MHz)  $\delta = 28.4, 36.9, 102.2, 121.4, 129.4, 129.9, 145.0, 147.8, 196.3$  ppm; IR (neat)  $\nu$  ( $\text{cm}^{-1}$ ) 1610.64 ( $\text{C}=\text{C}$ )<sub>aromatique</sub>, 1661; HRMS (ES+)  $m/z$   $[\text{M} + \text{H}]^+$  calcd for  $\text{C}_{11}\text{H}_{13}\text{ClNO}$  210.0686; found 210.0693.

1 D. R. Chisholm, R. Valentine, E. Pohl and A. Whiting, *J. Org. Chem.*, 2016, **81**, 7557–7565.

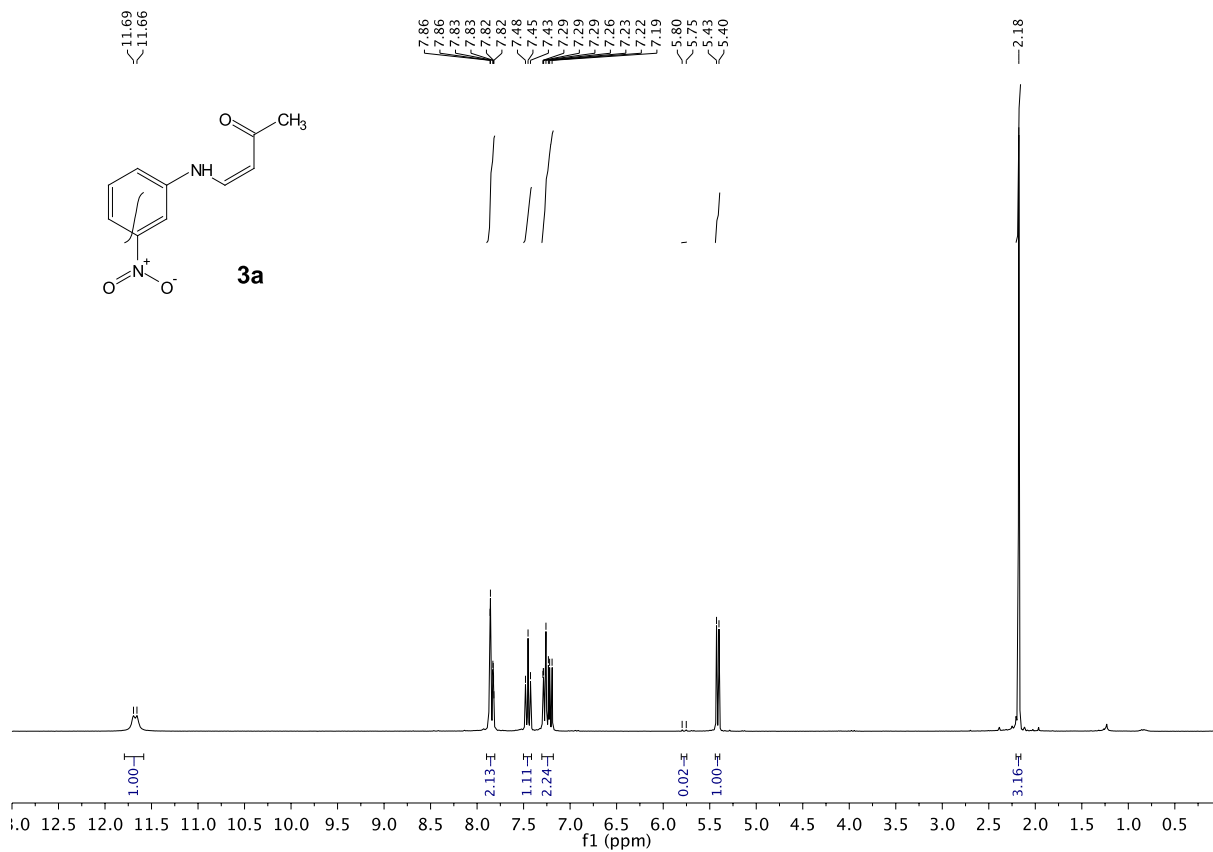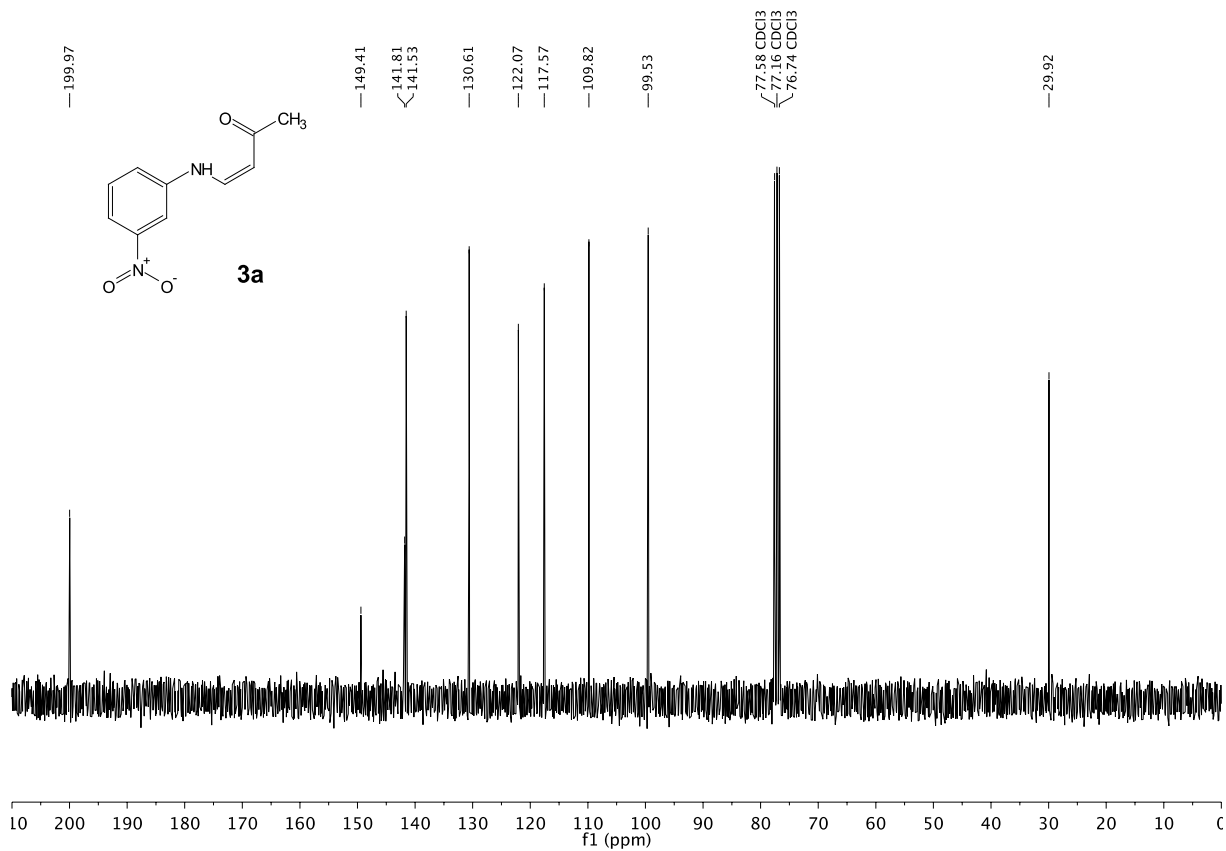

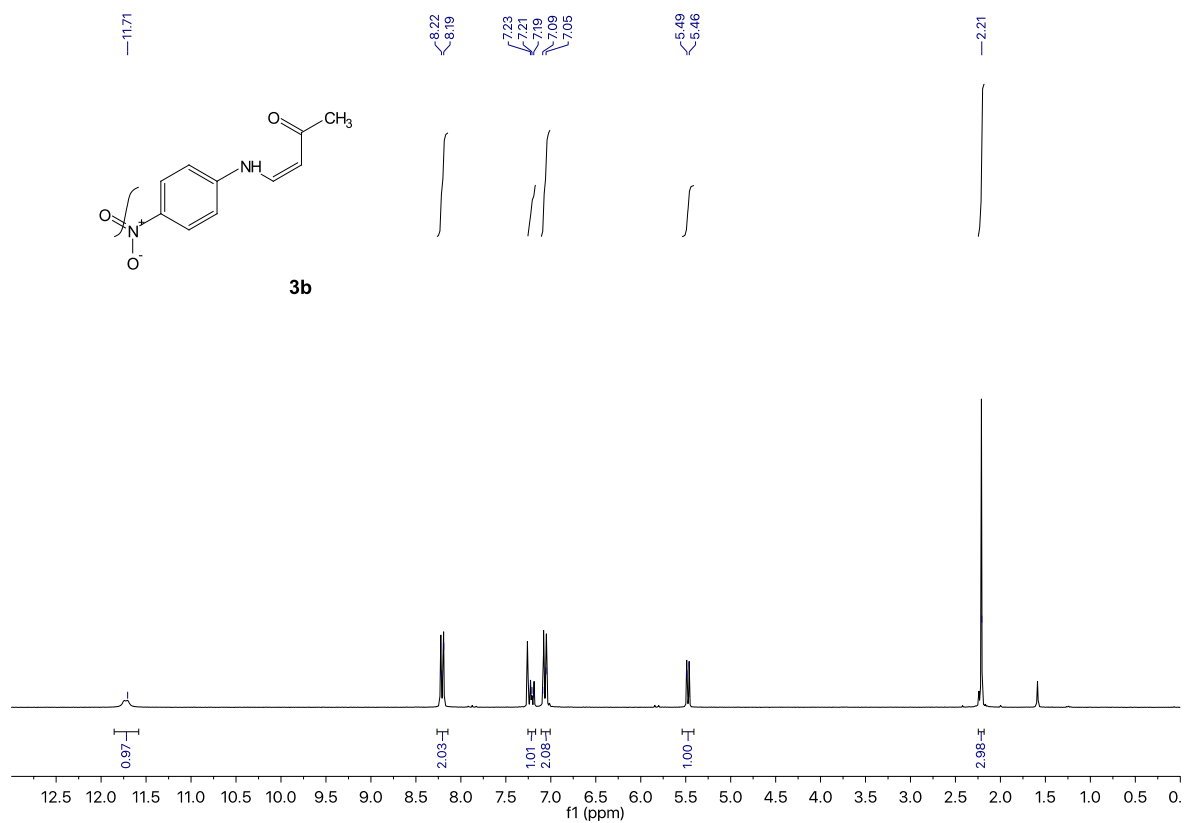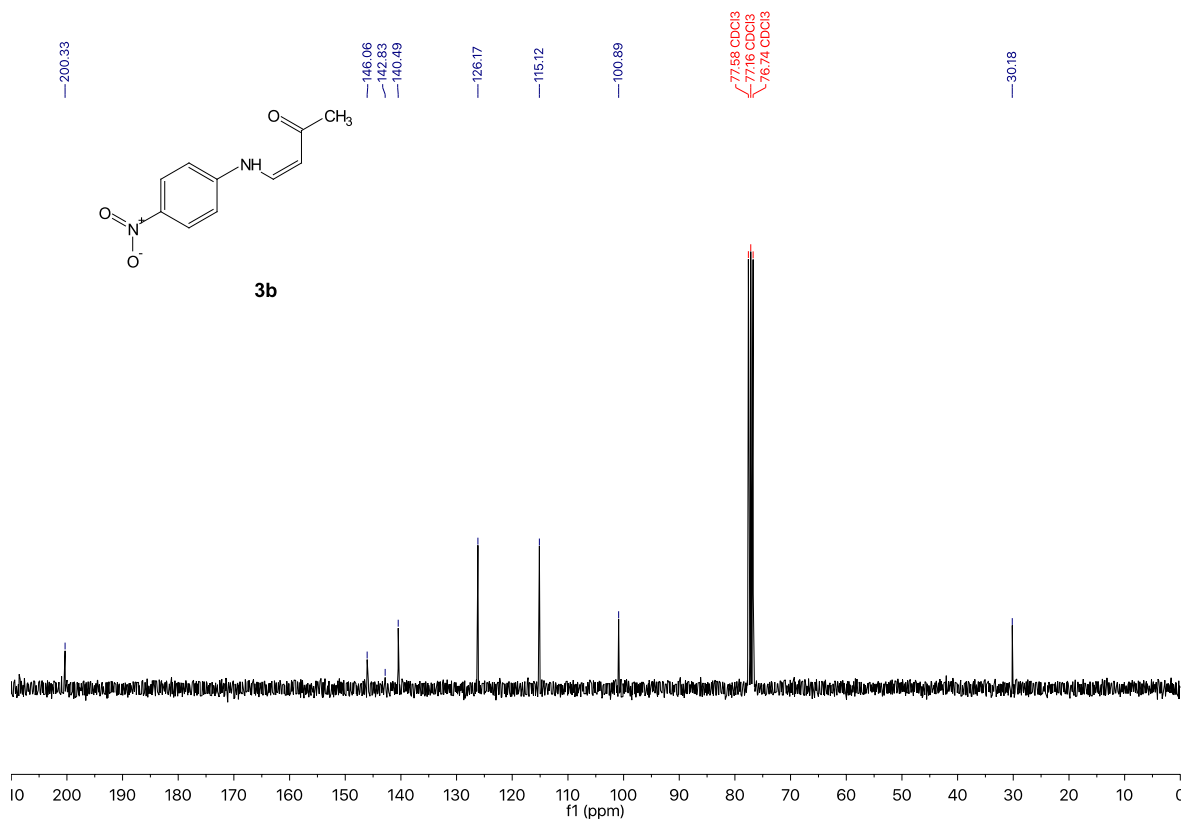



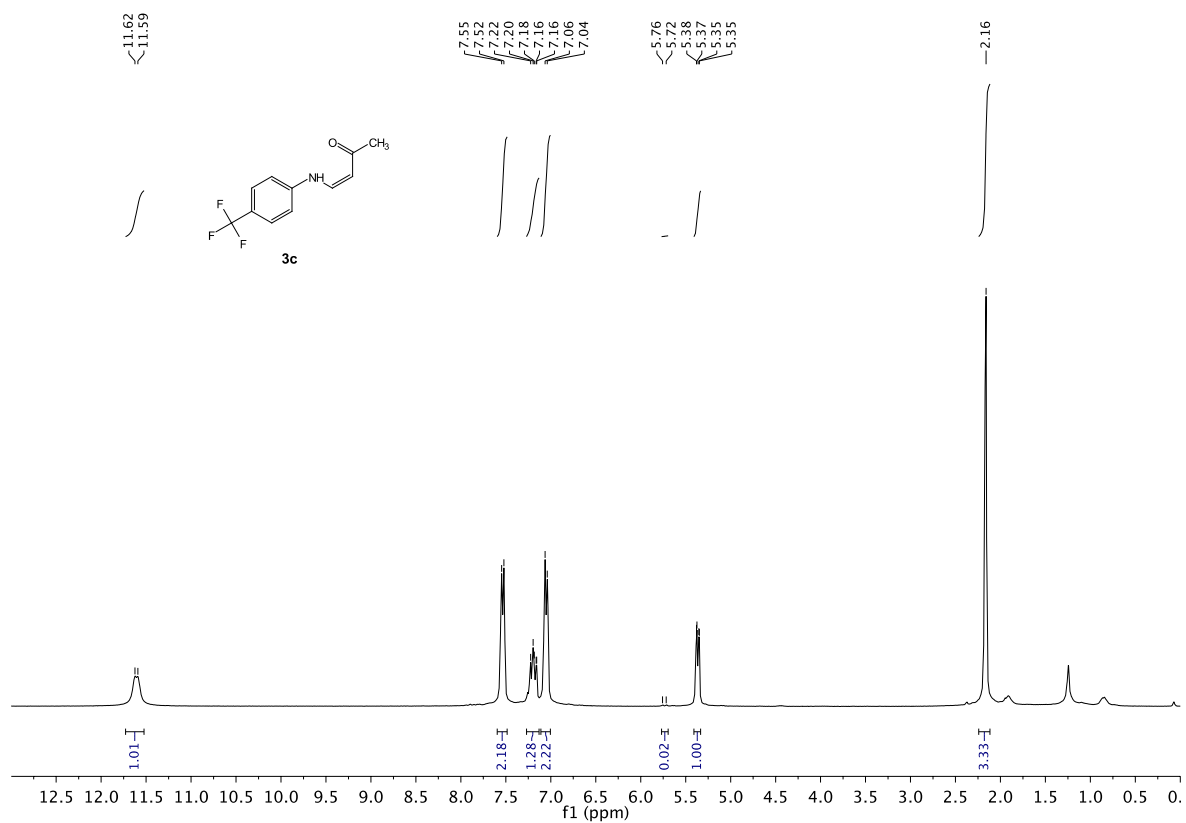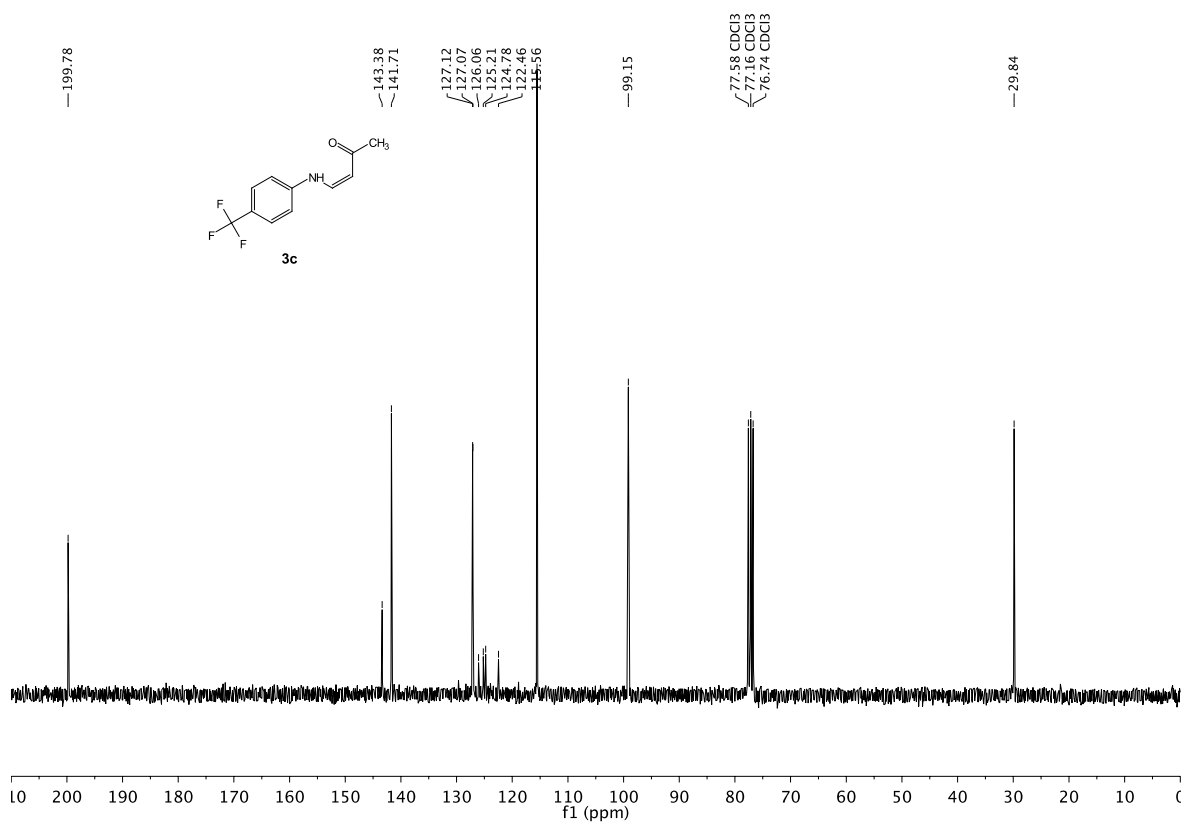

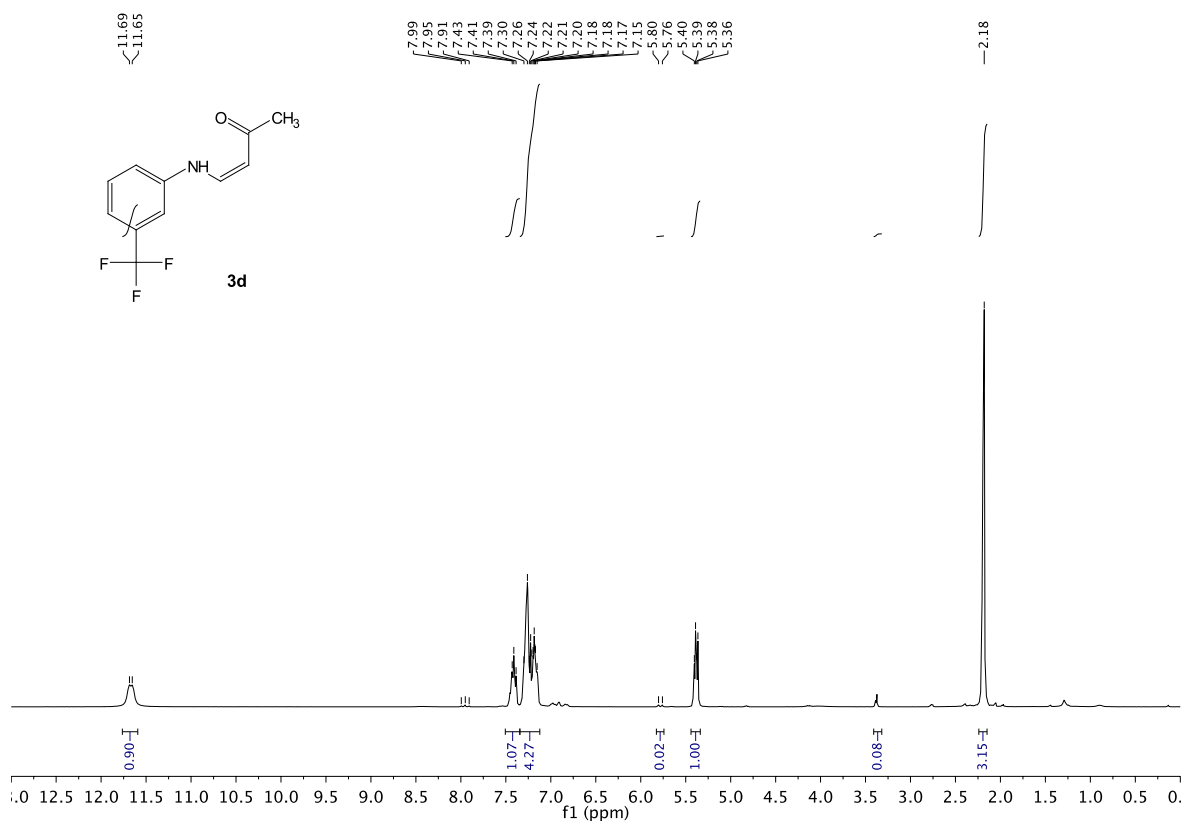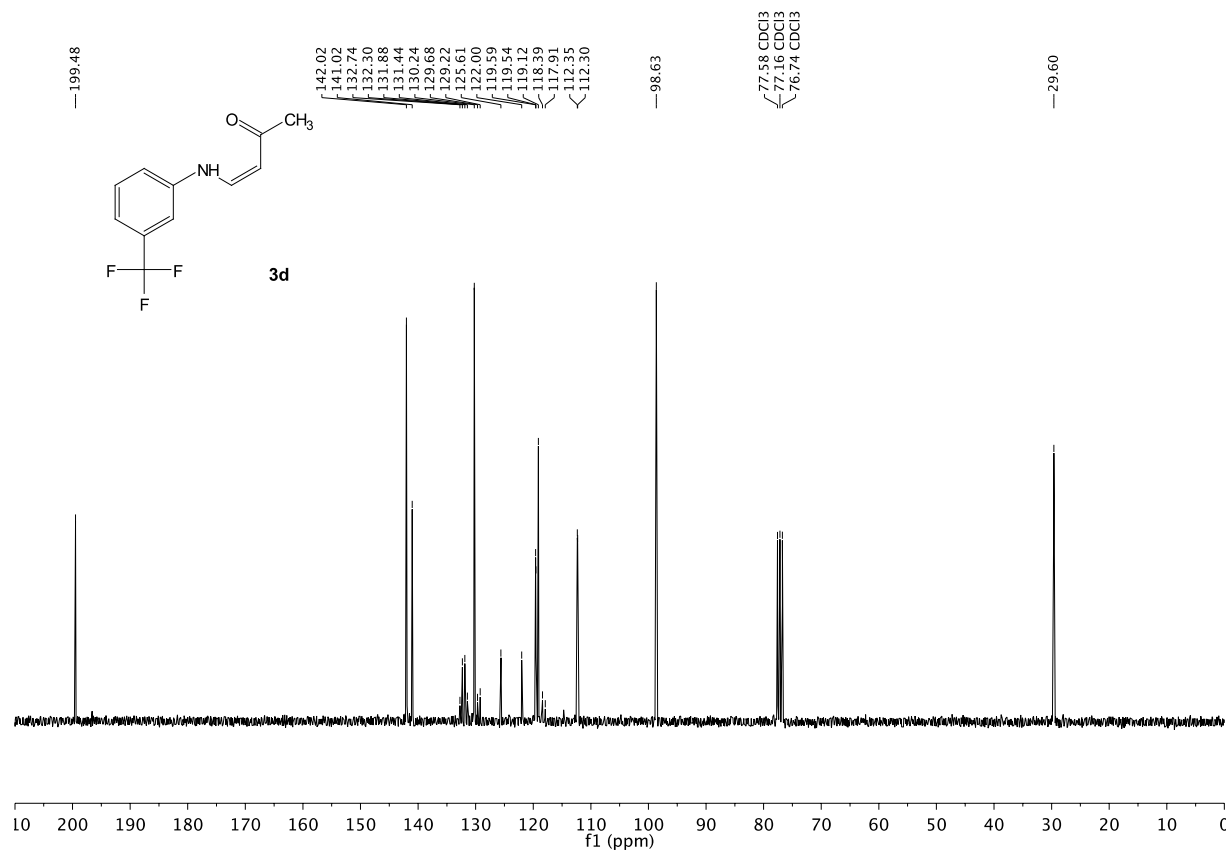

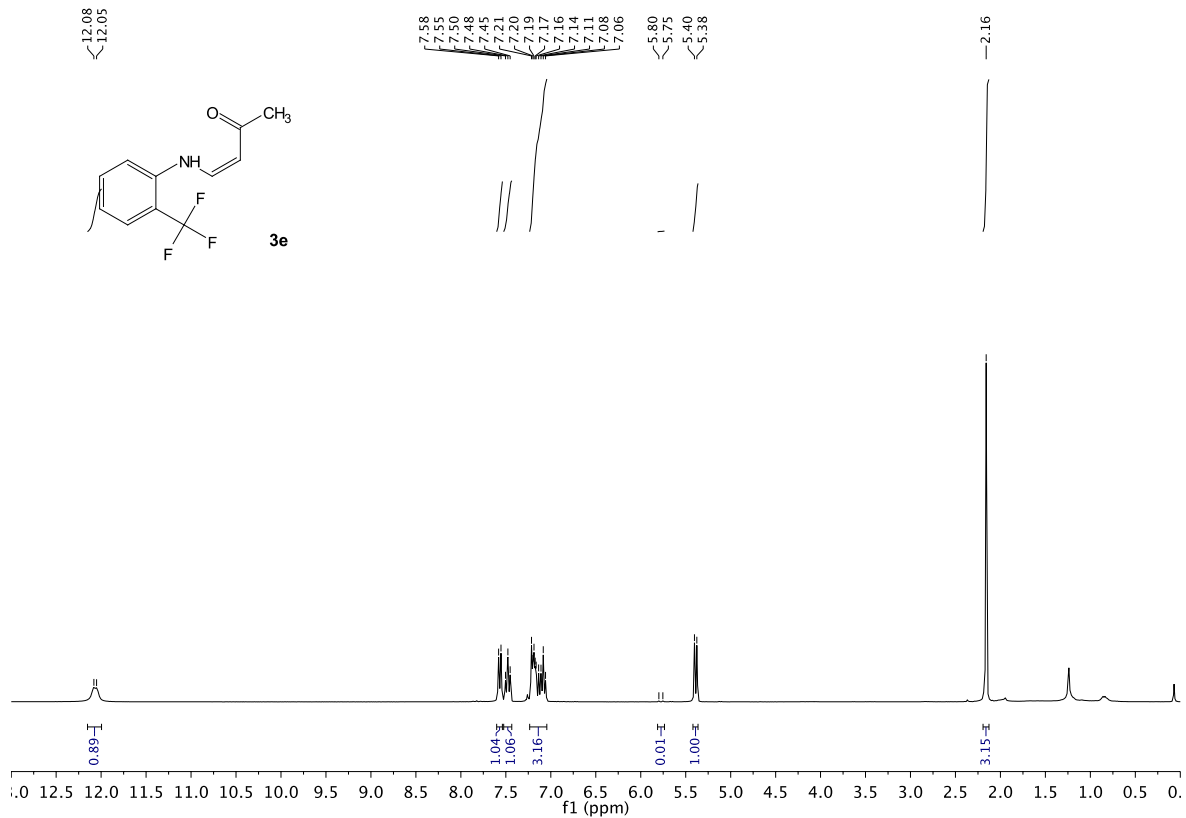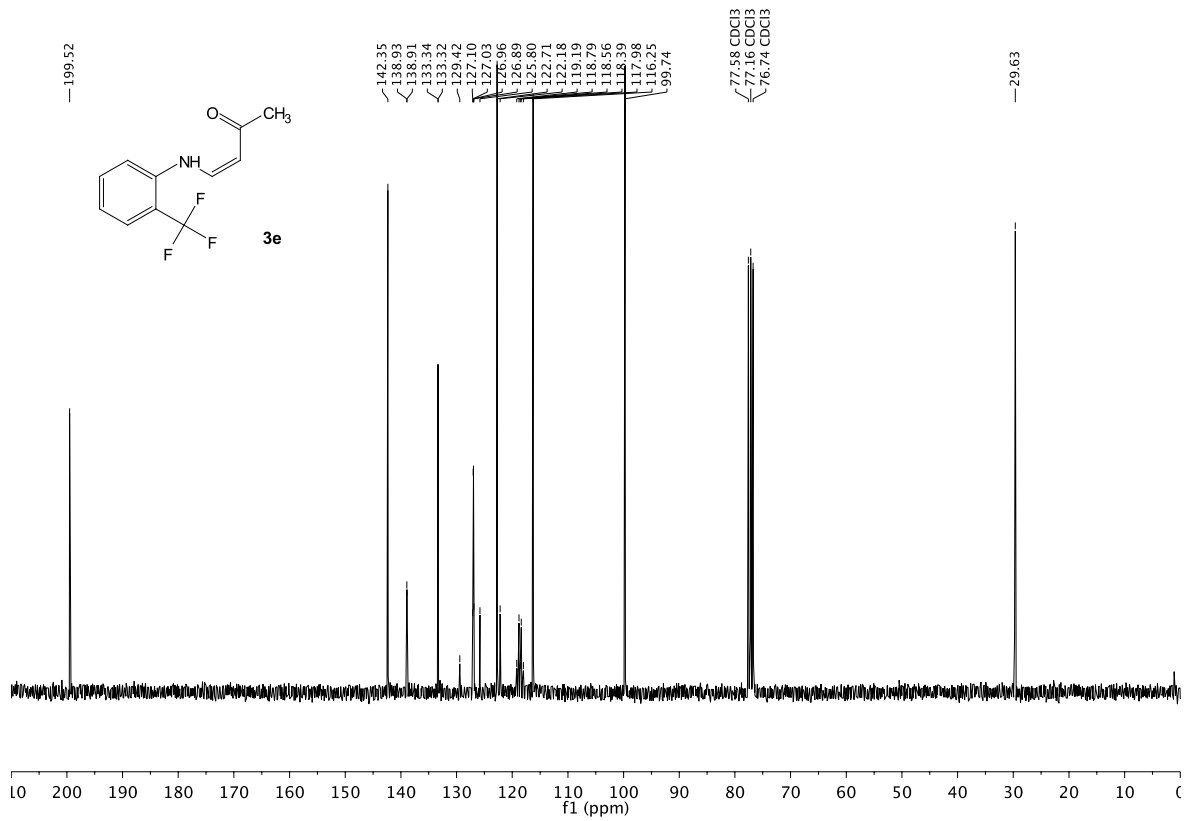

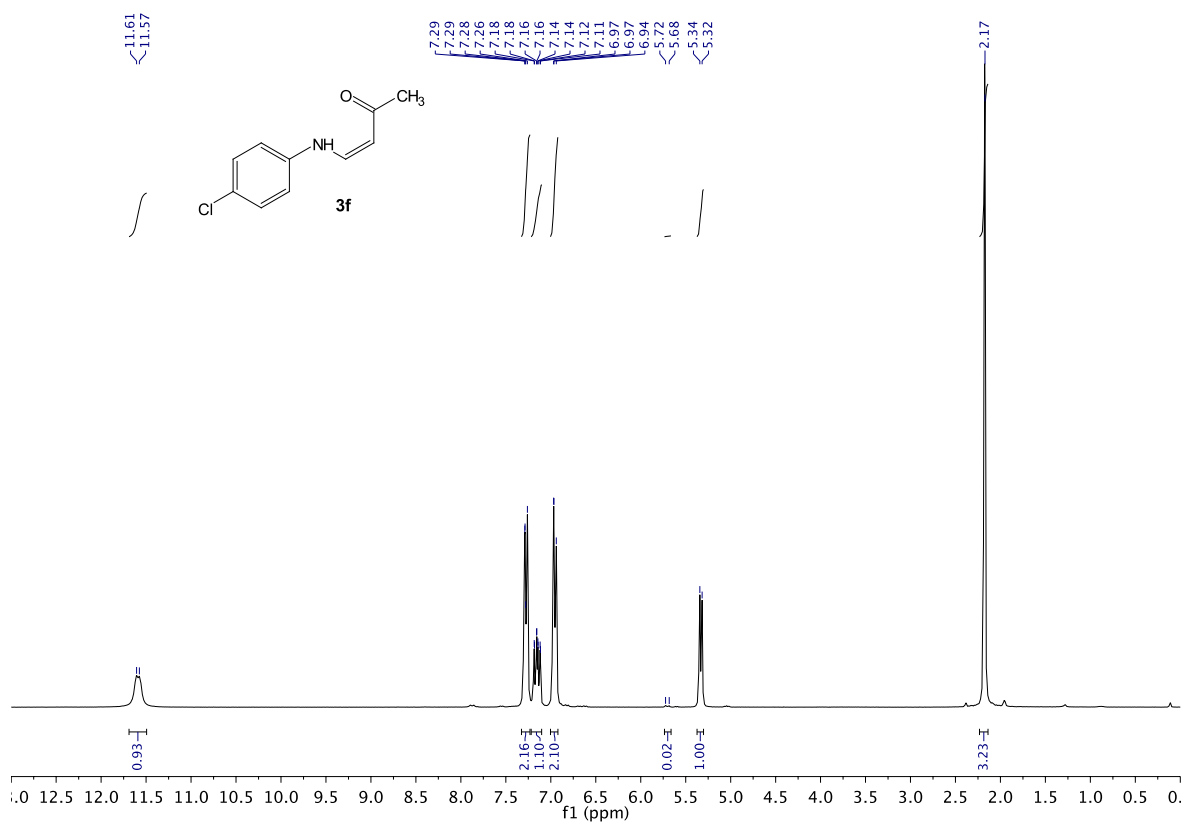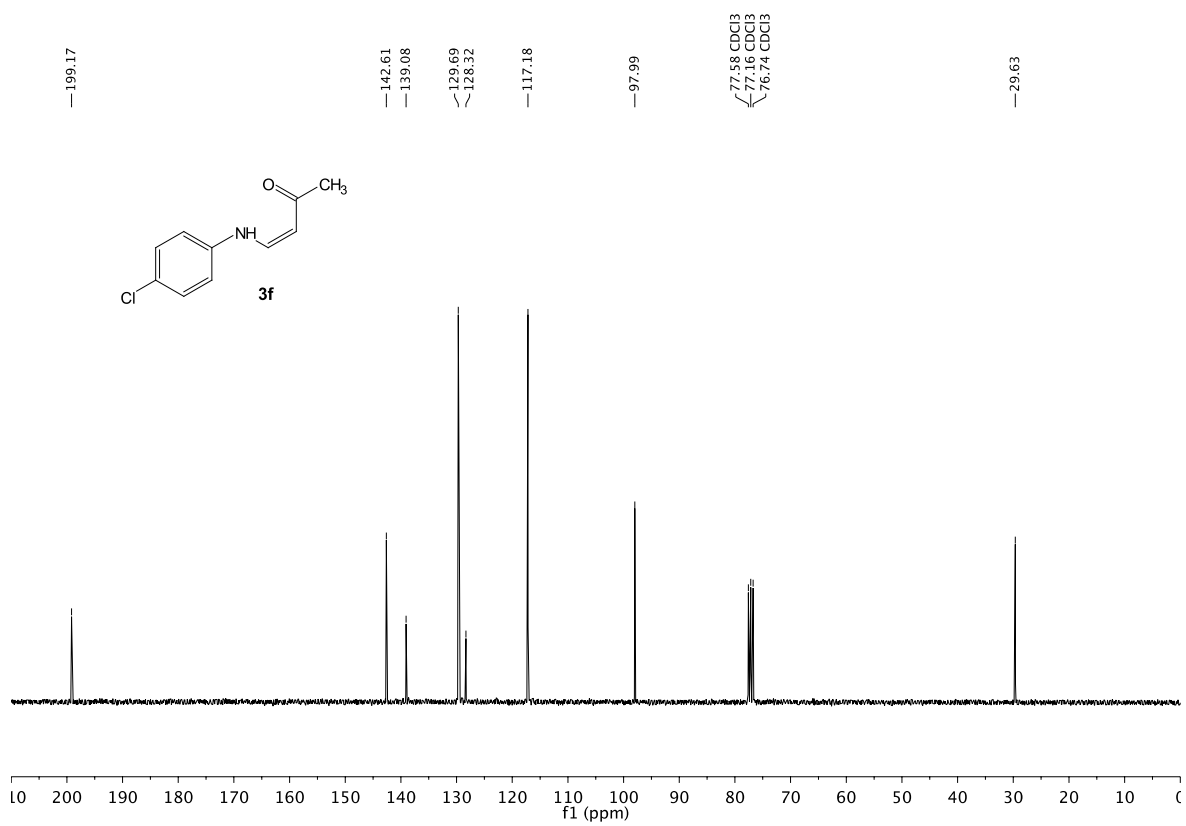

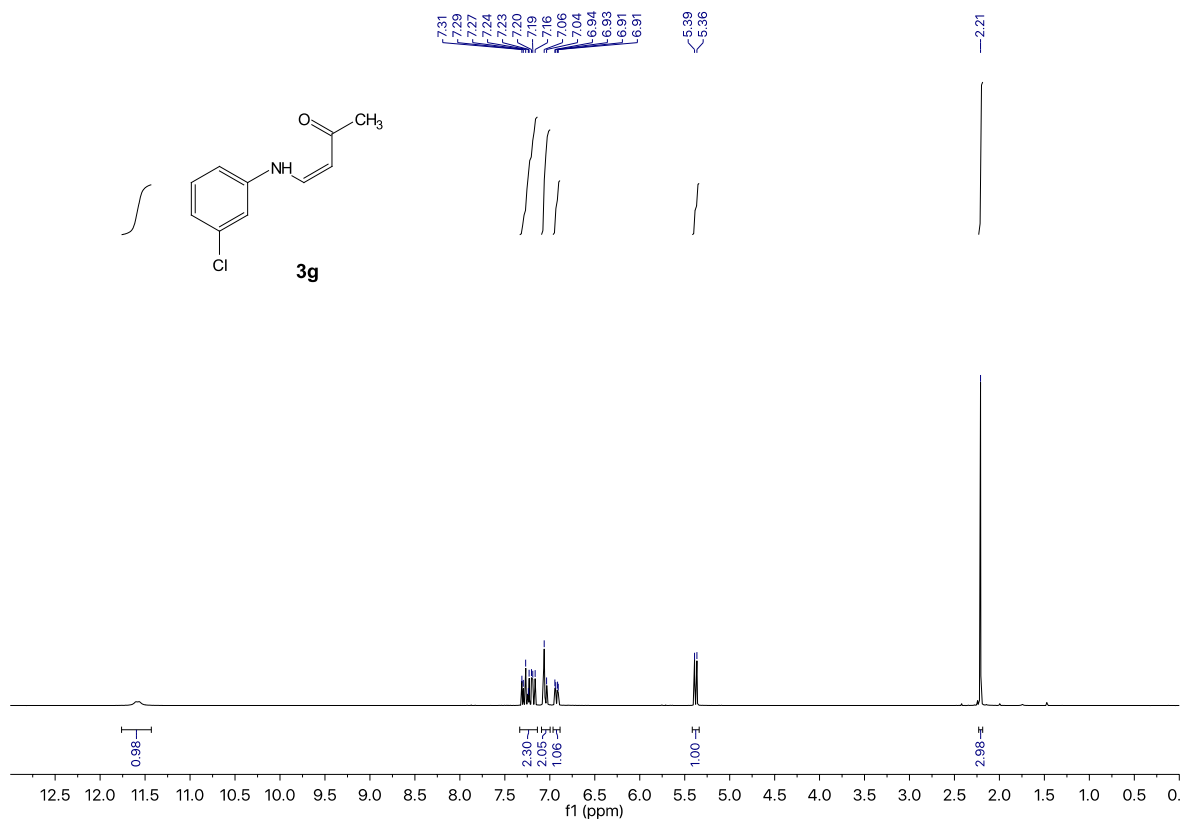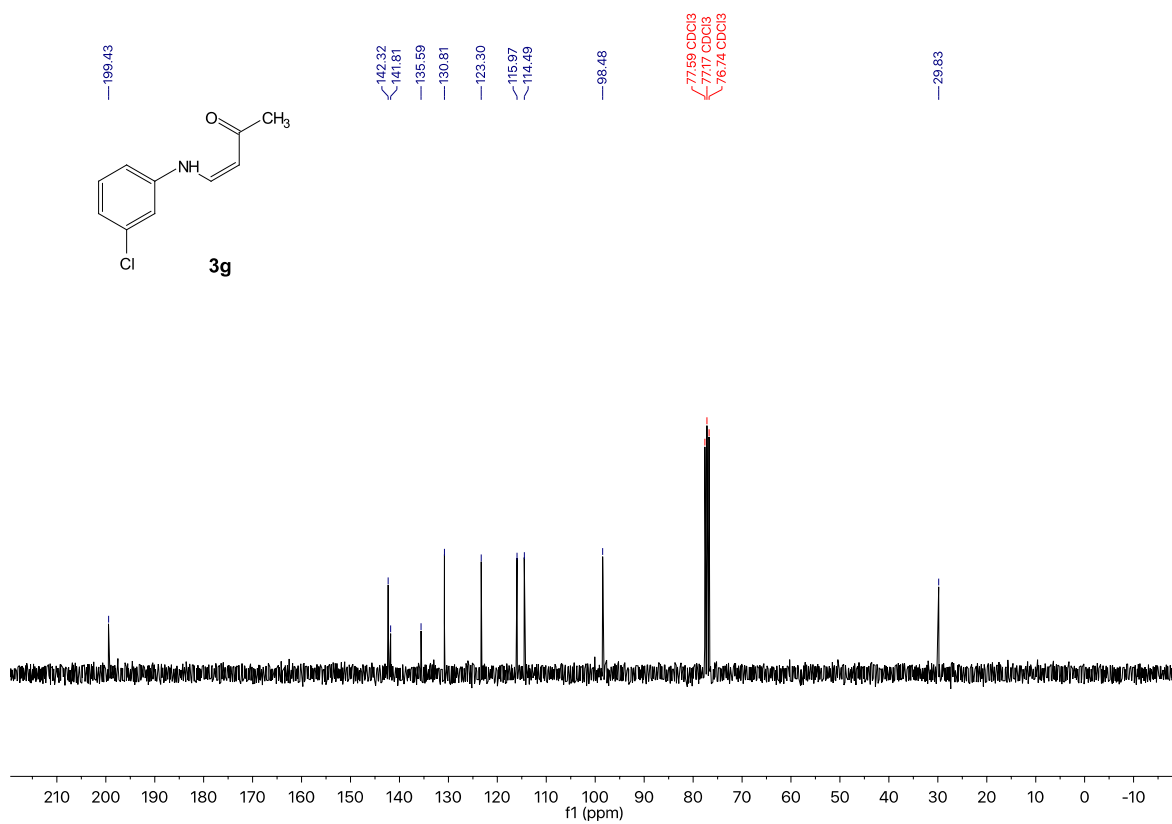

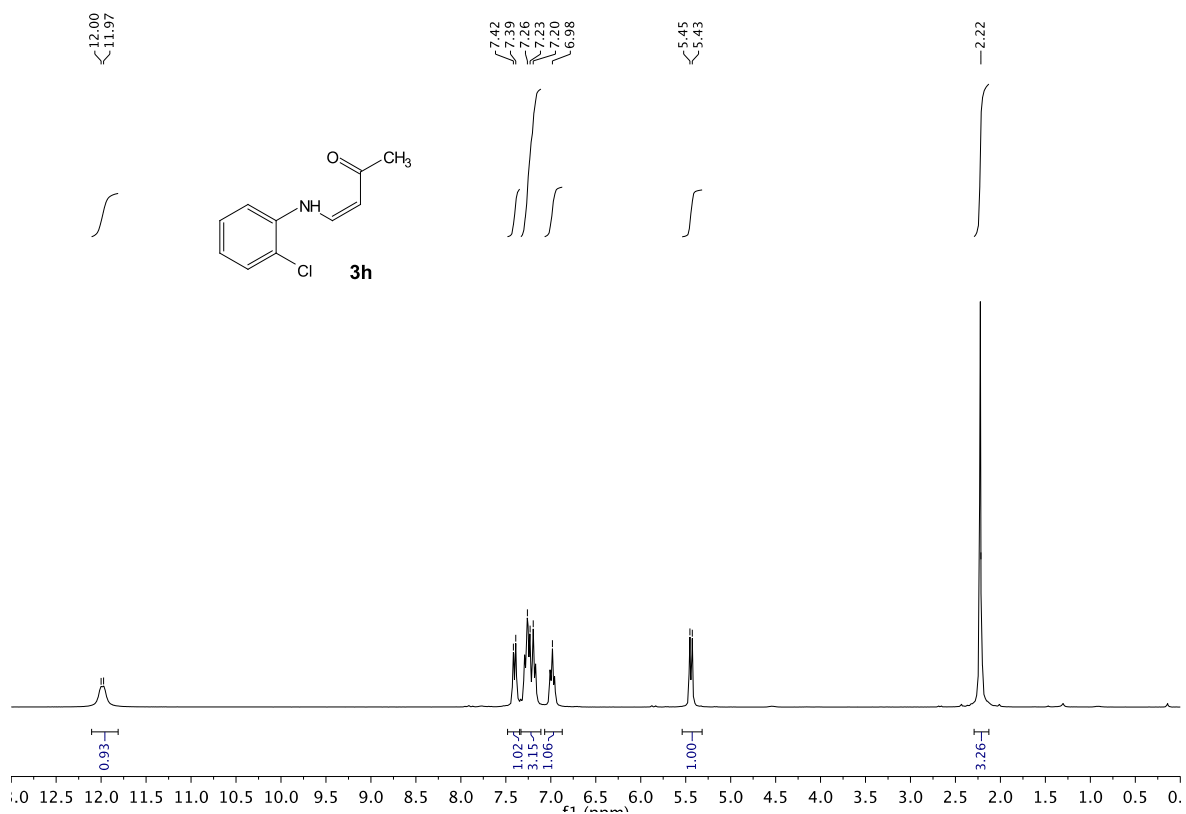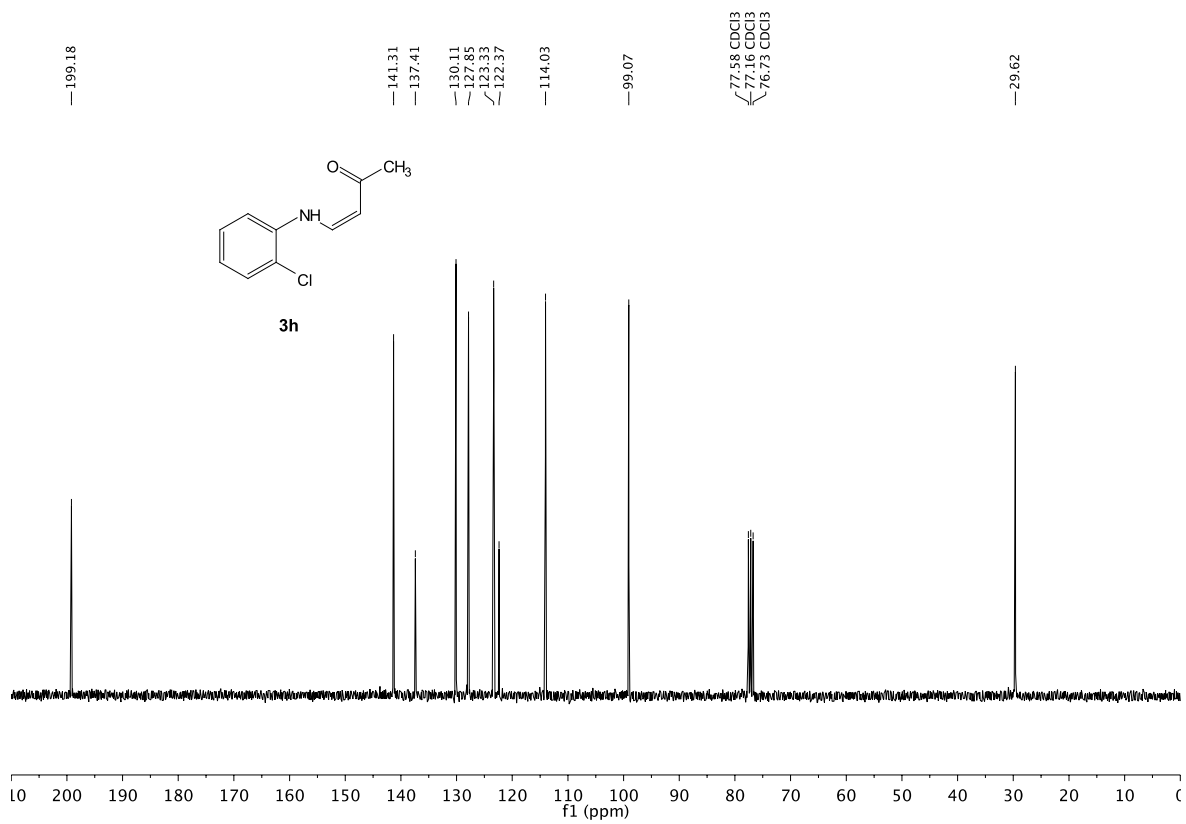

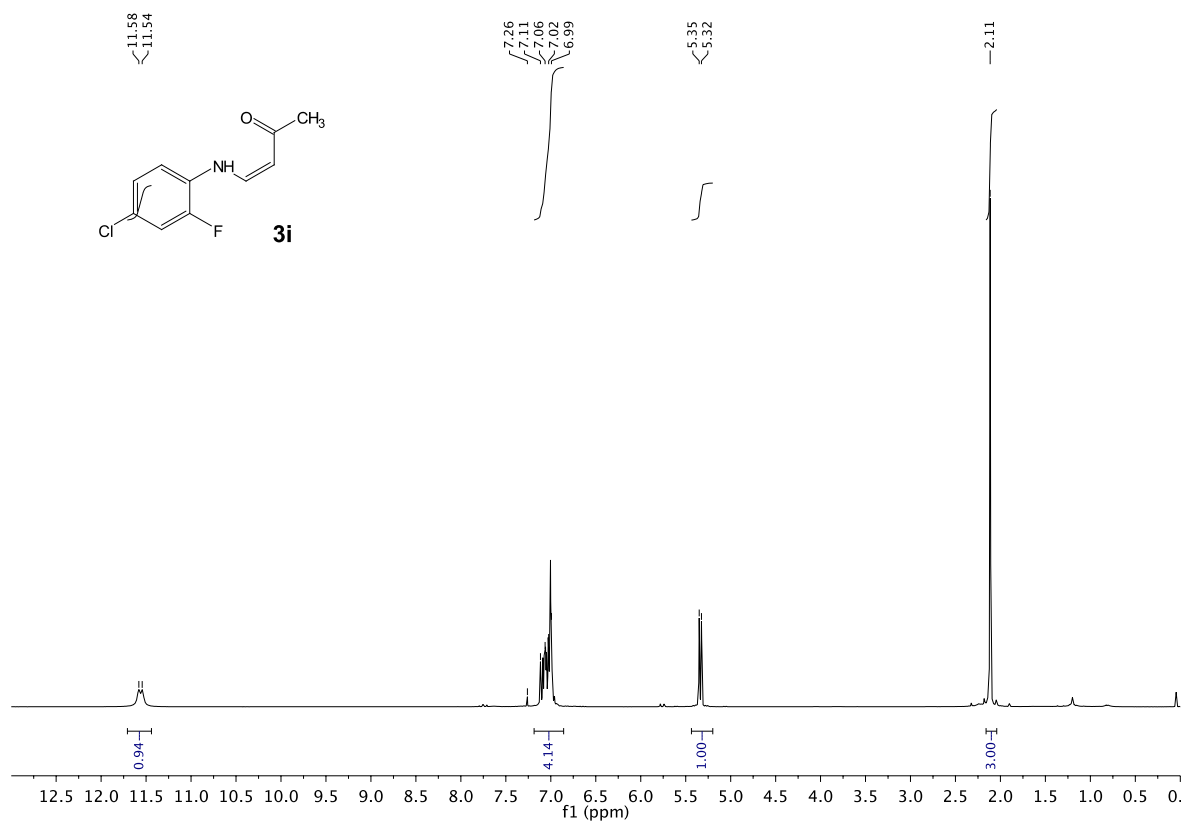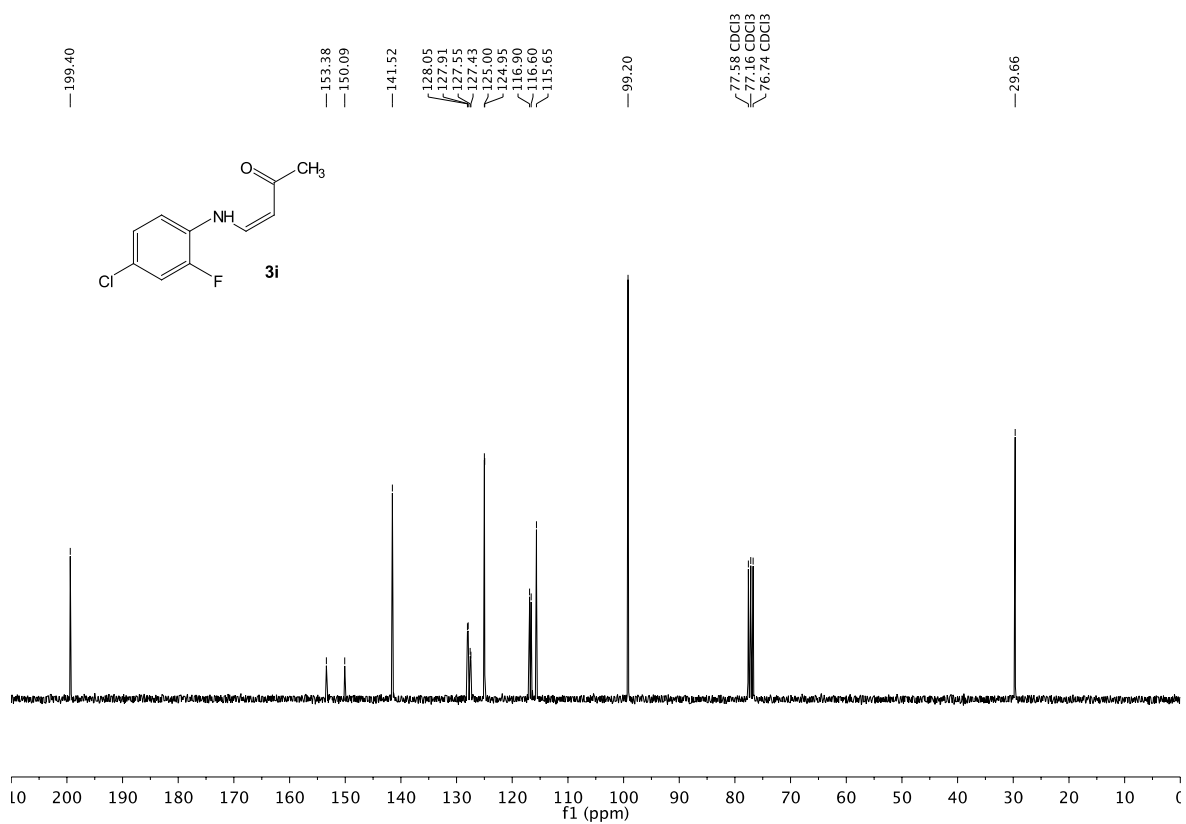

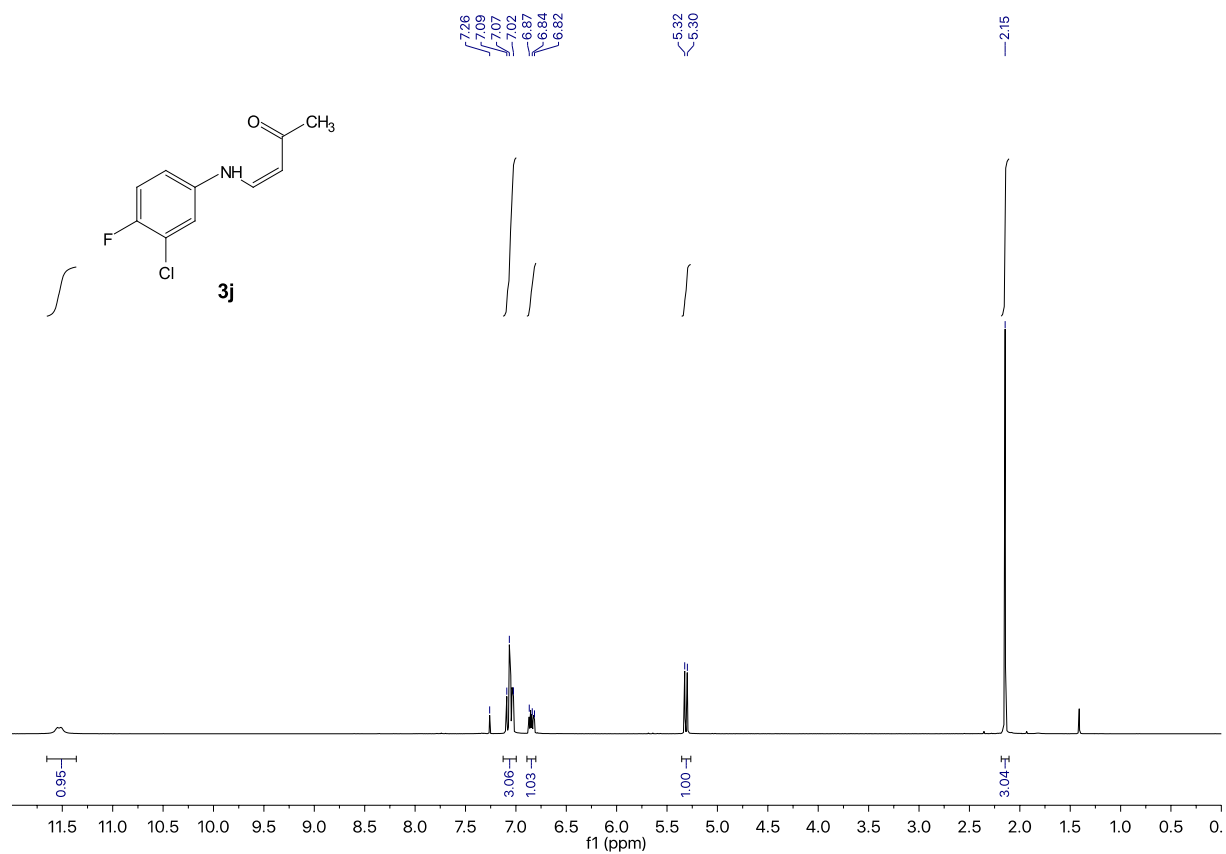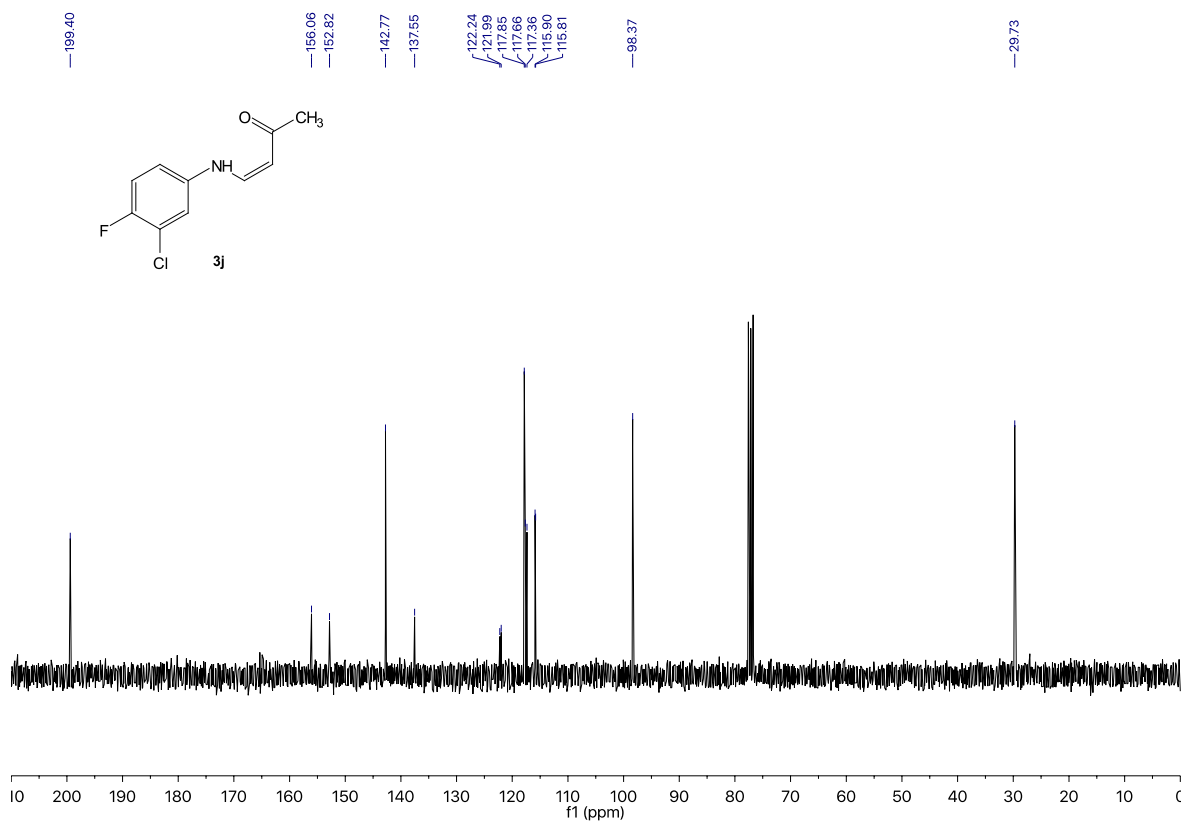



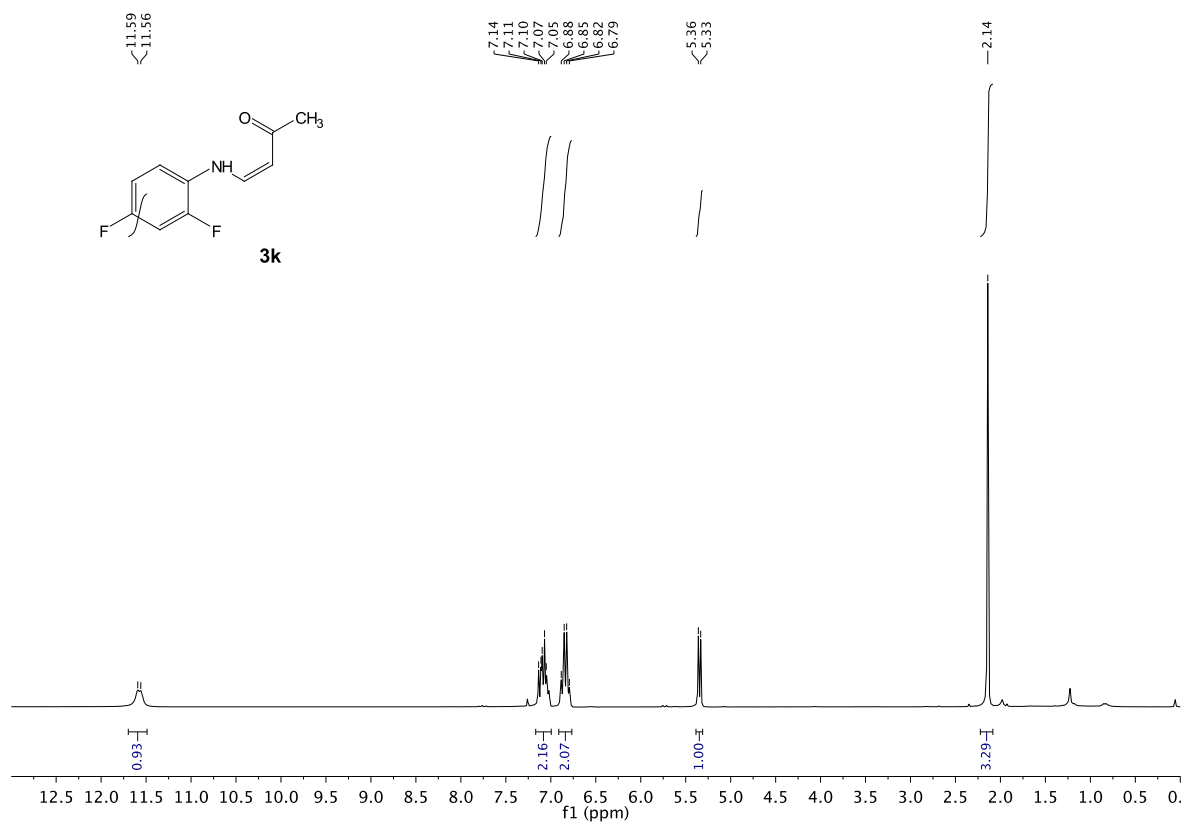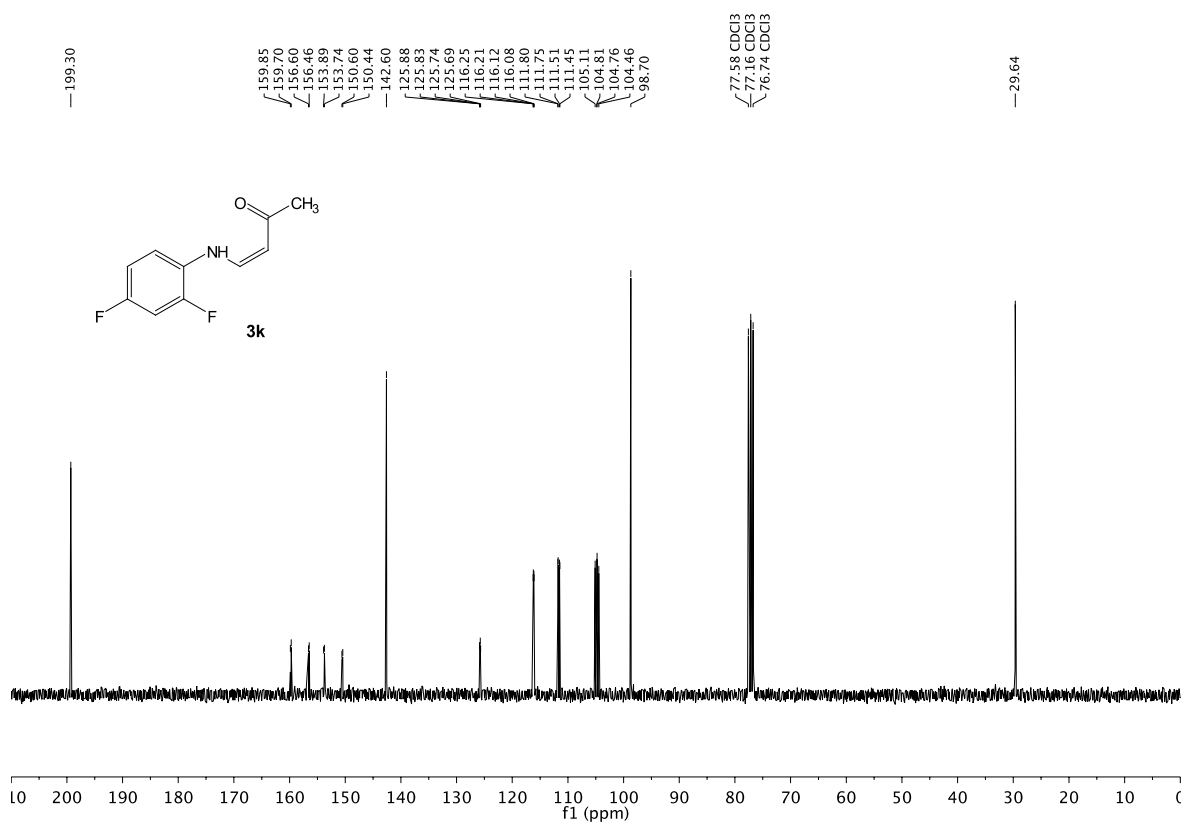

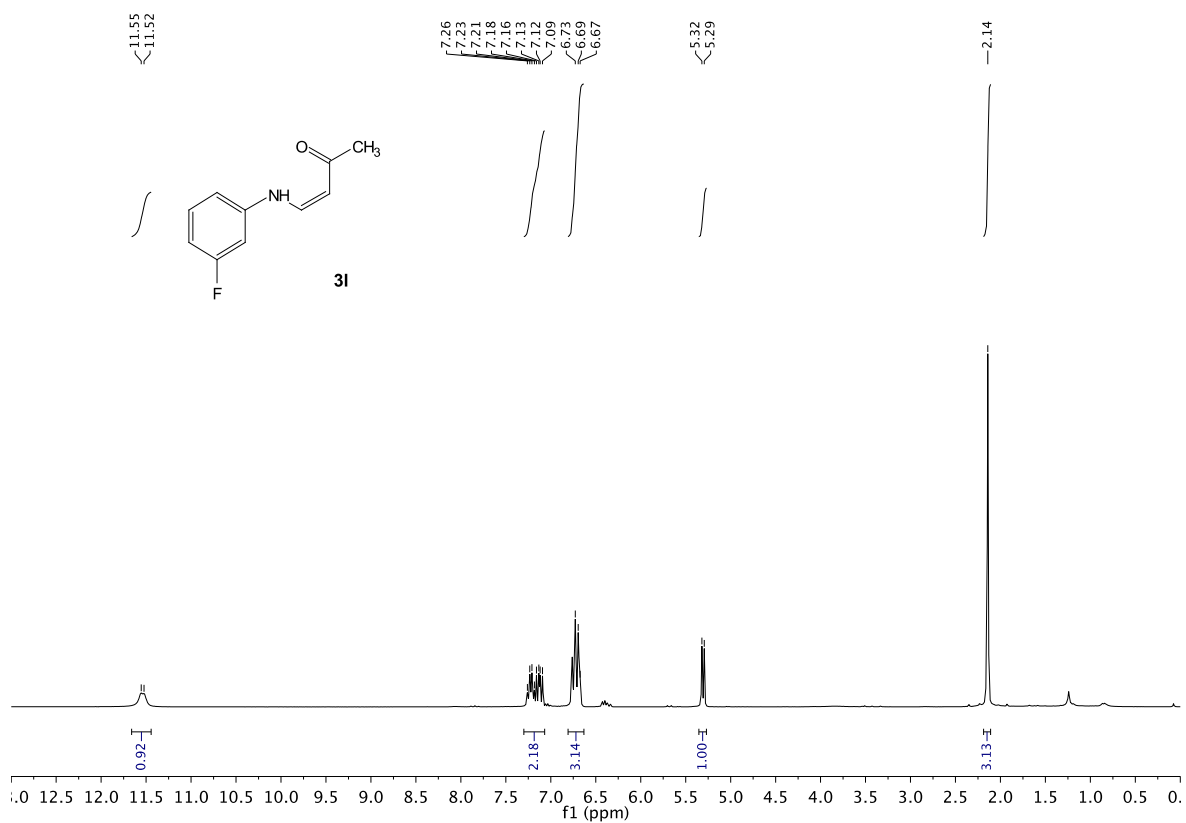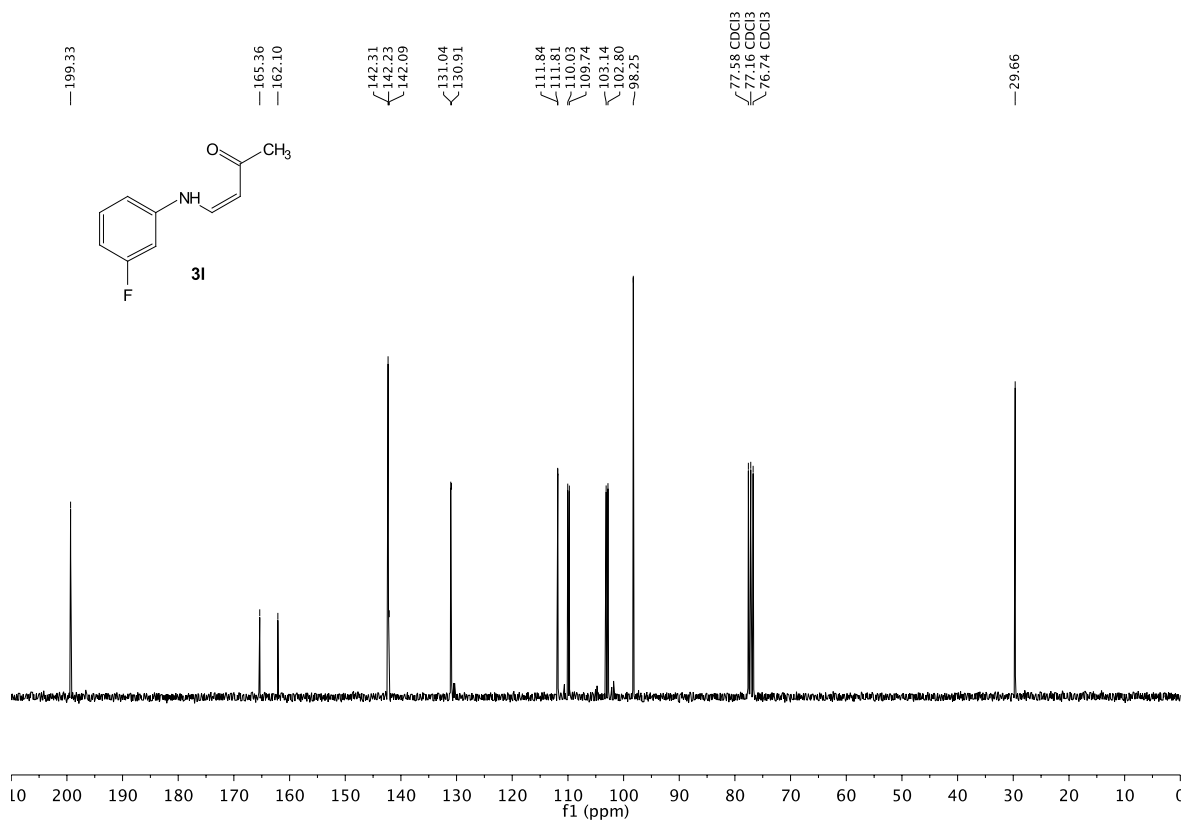

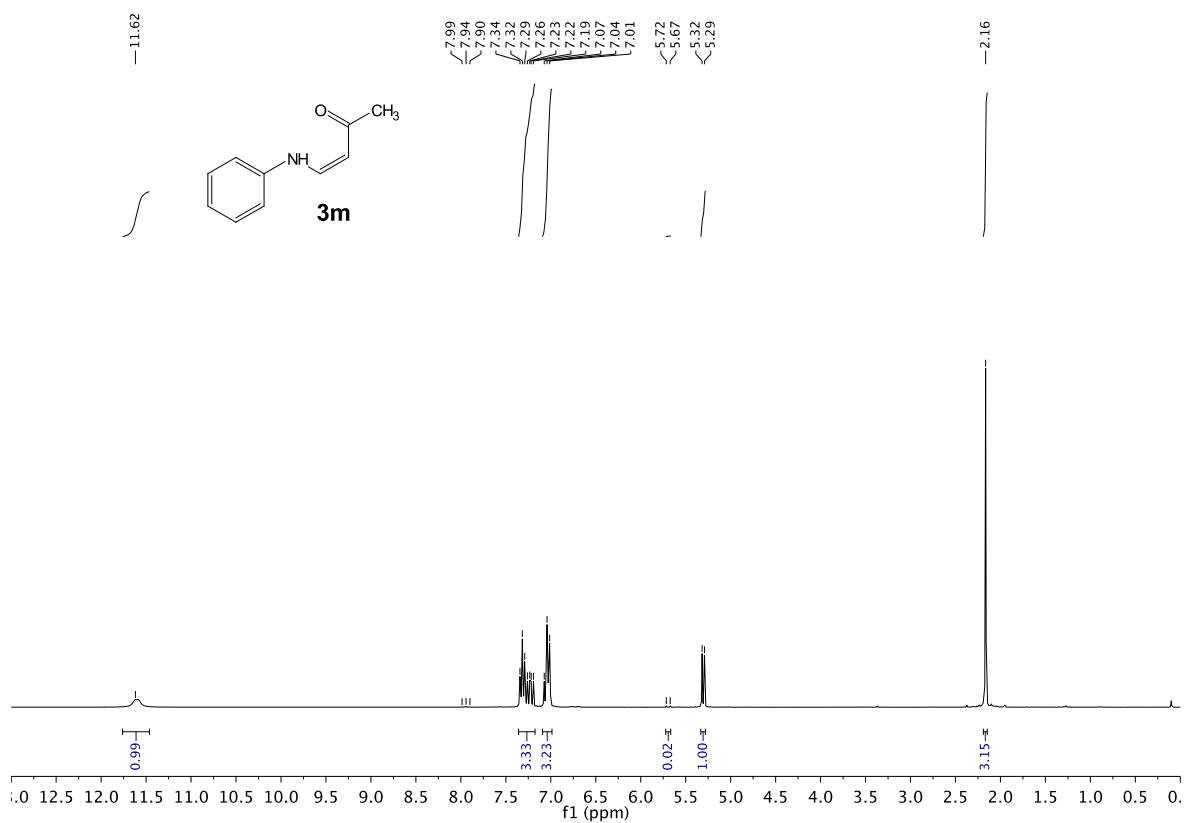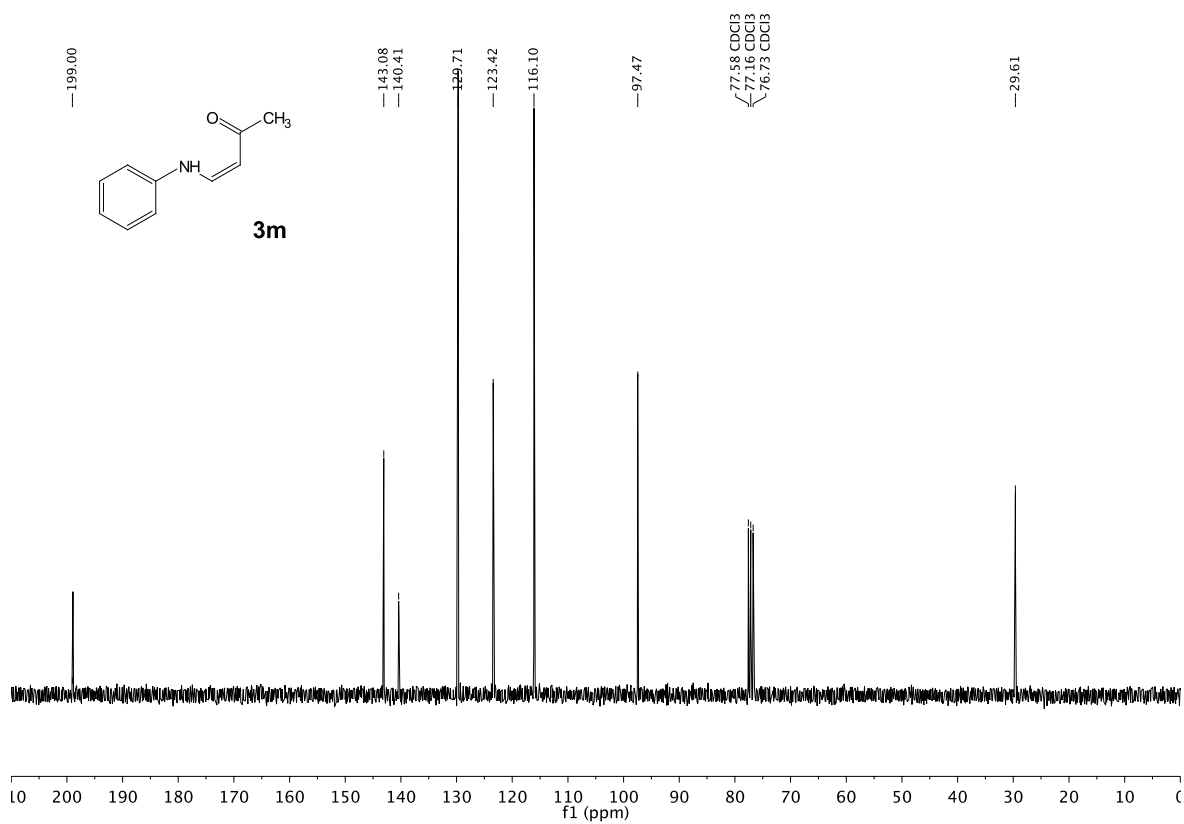

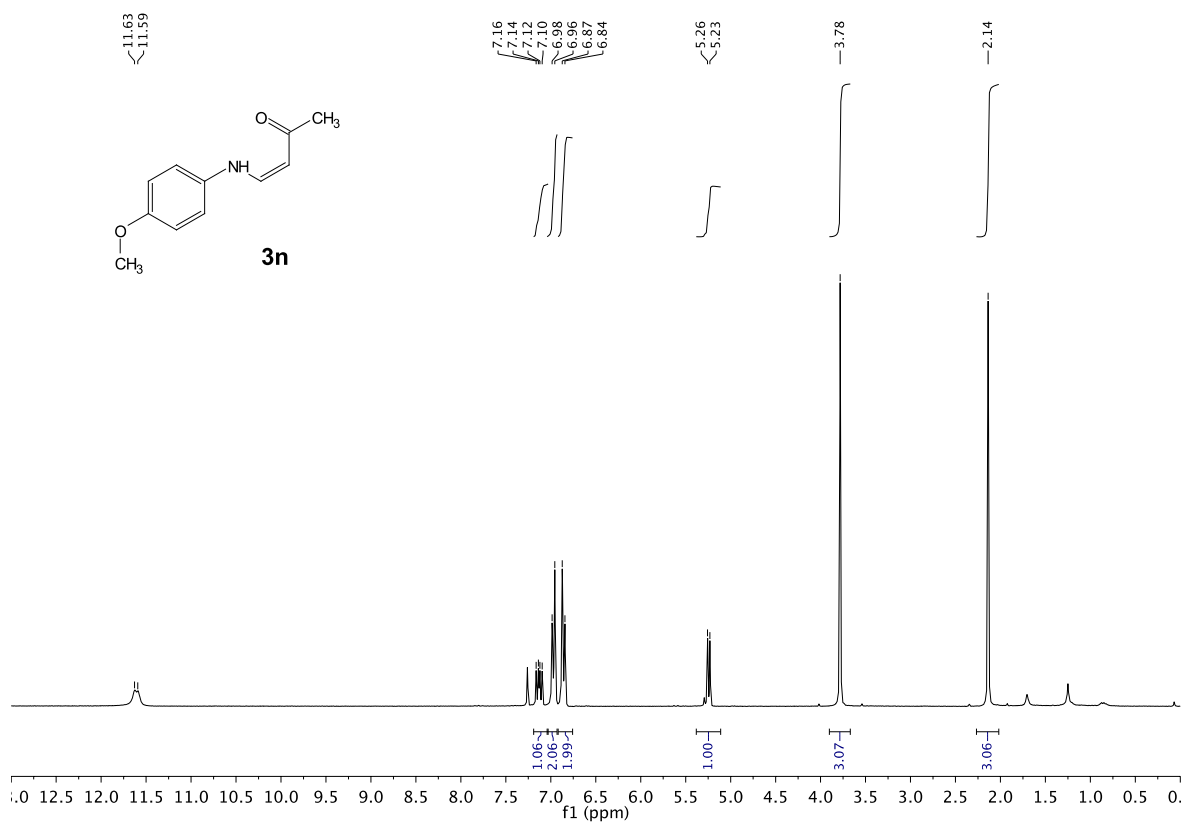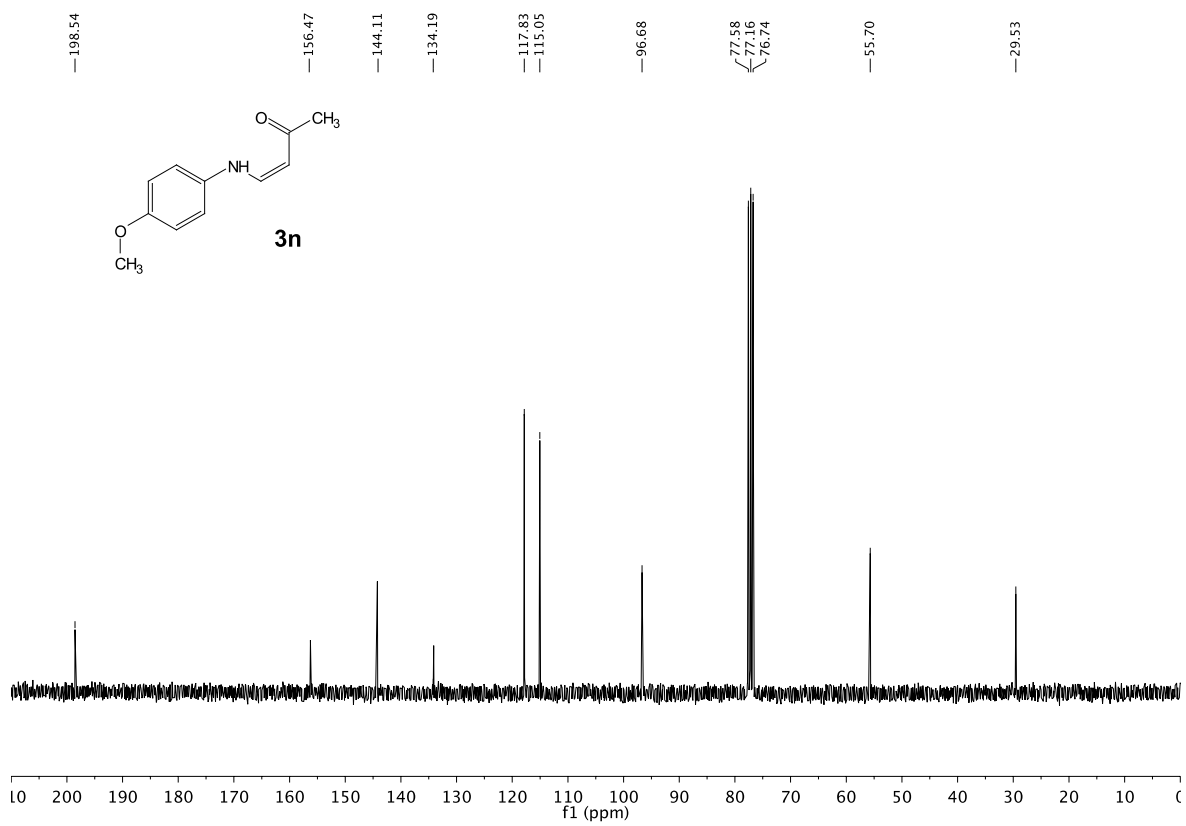

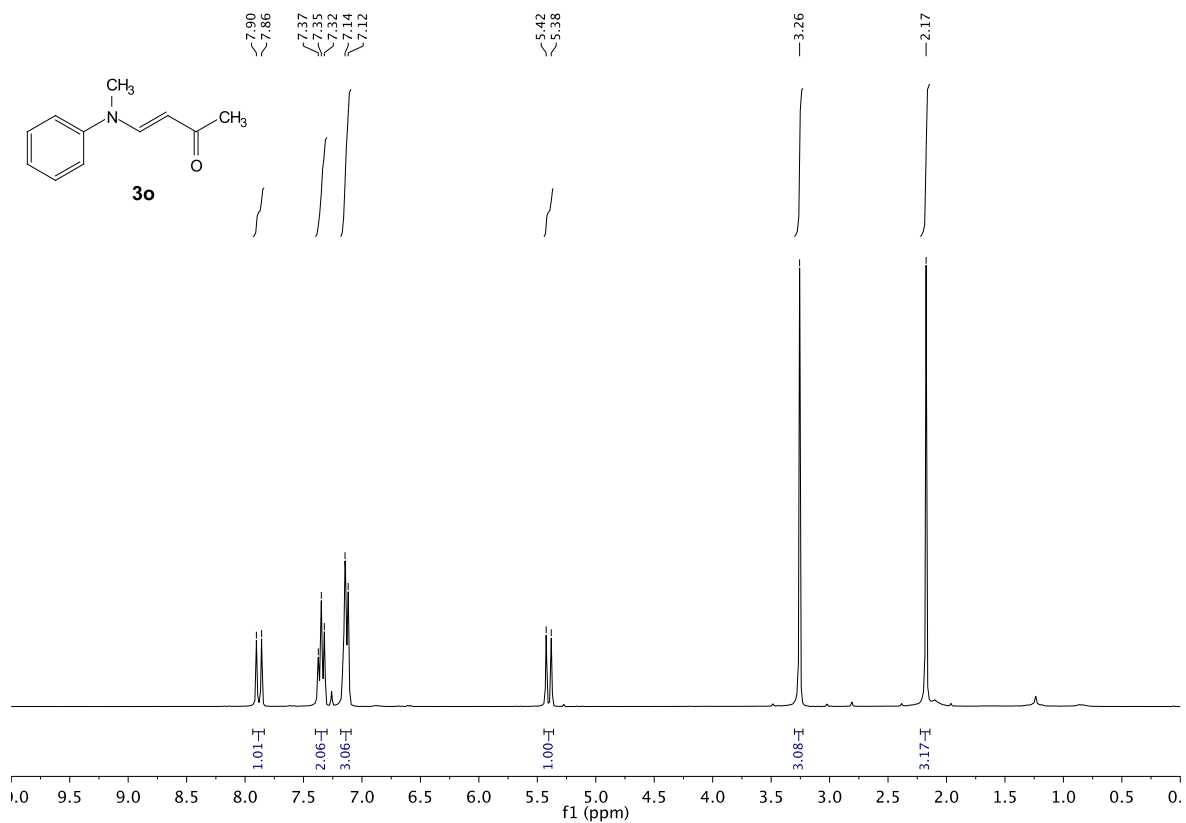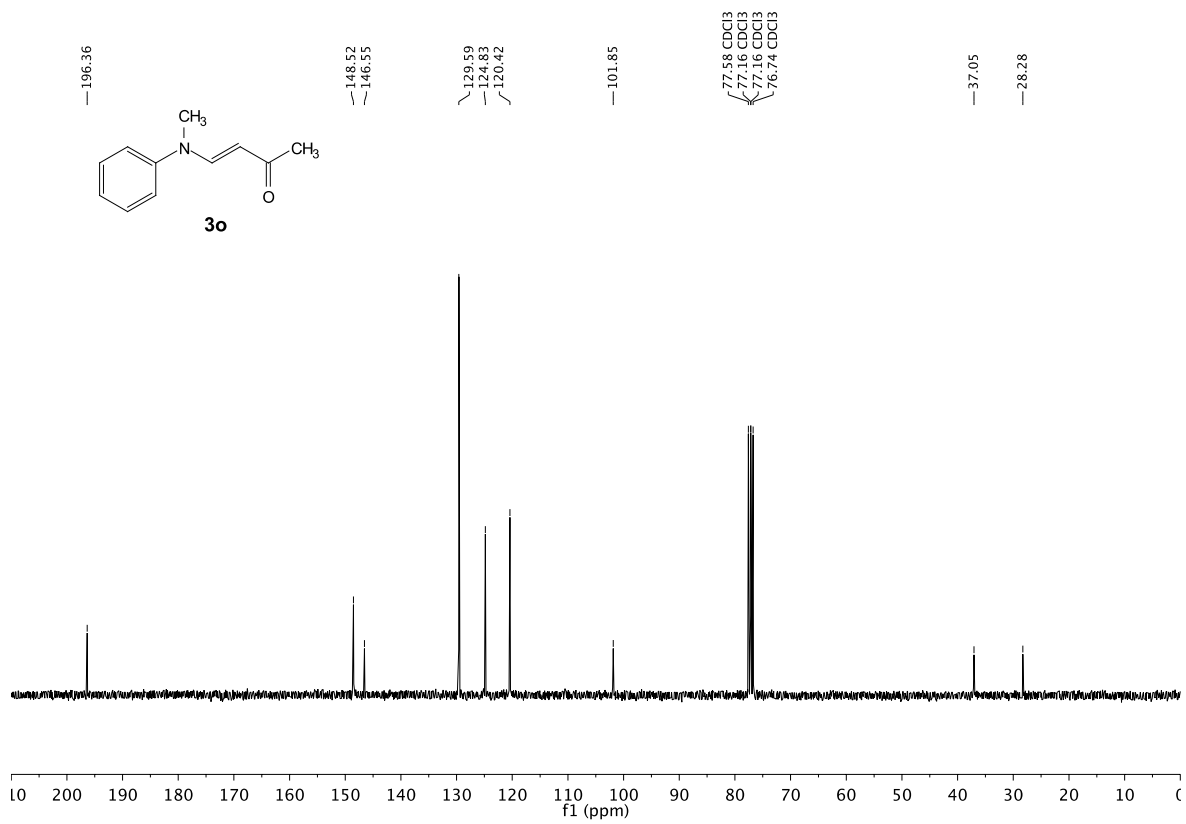

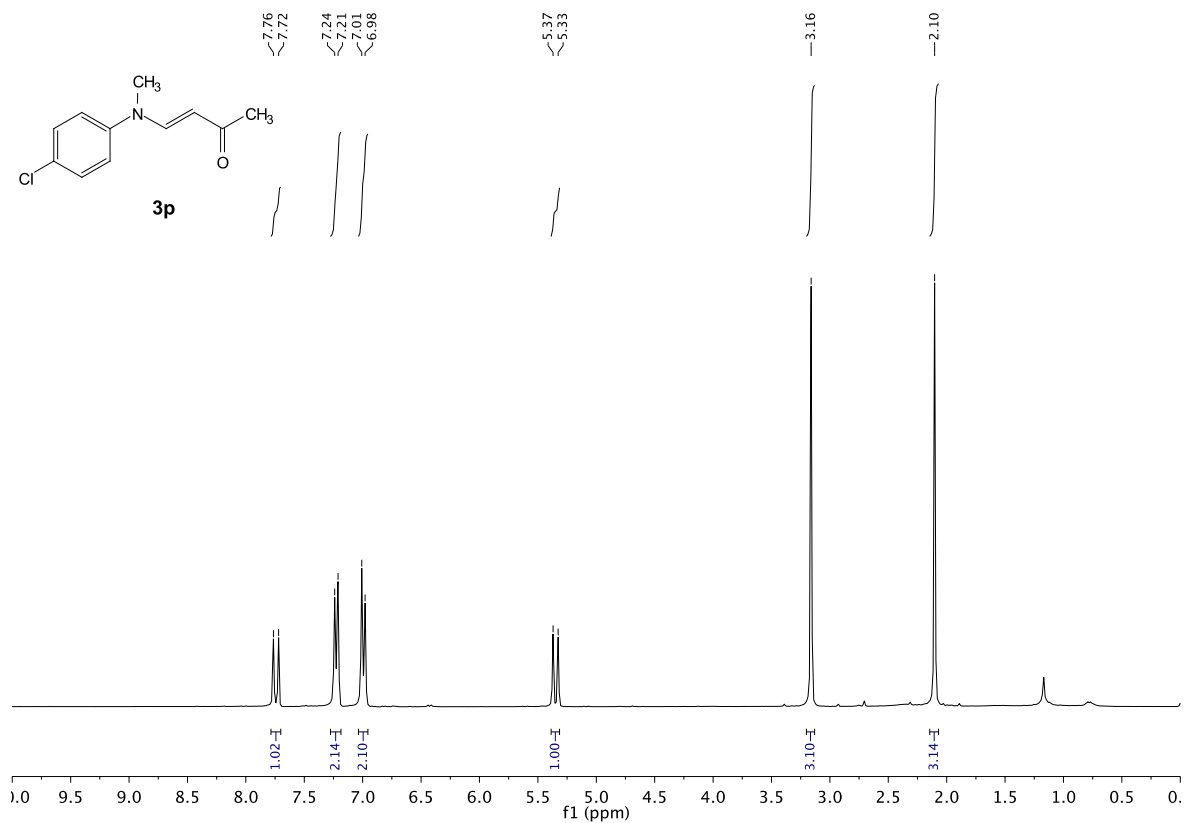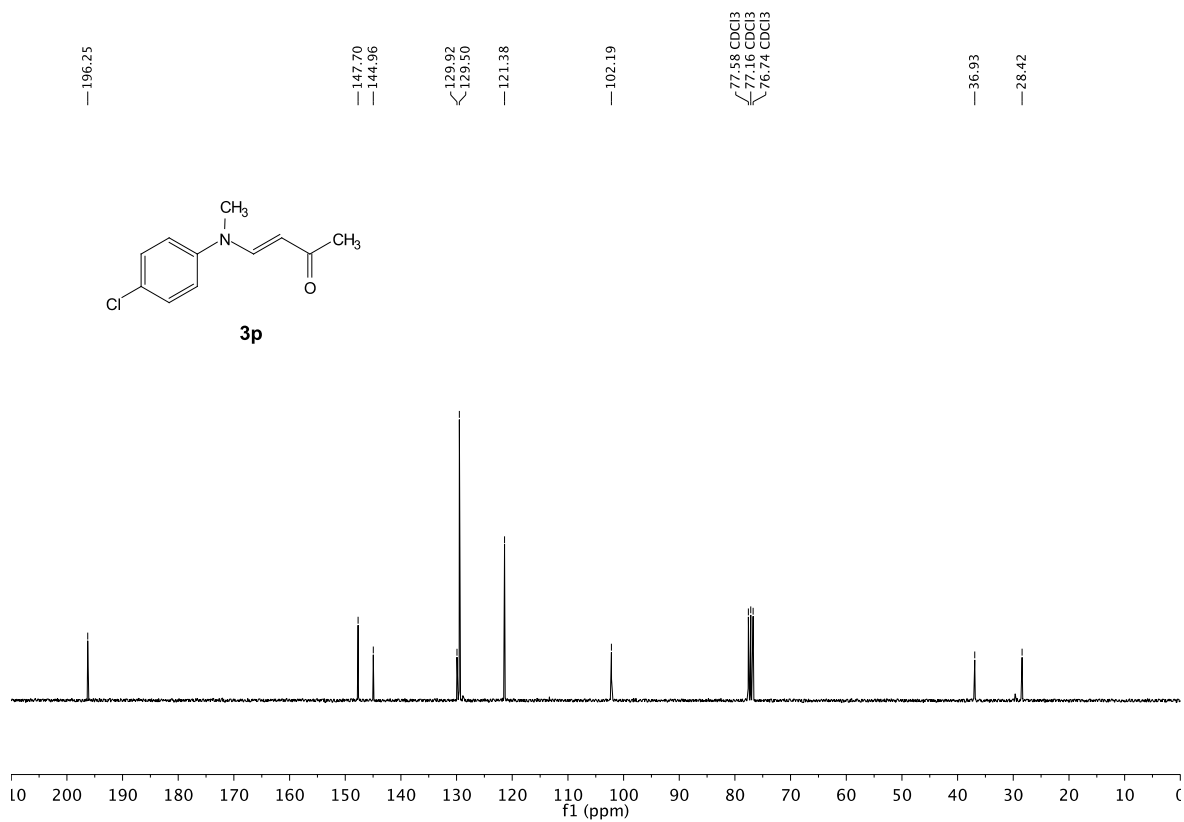

Supplement: c6ob02402e1.pdf [file c6ob02402e1.pdf]
